1  
2  
3  
4  
5  
6  
7  
8  
9  
10  
11  
12  
13  
14  
15  
16  
17  
18  
19  
20  
21  
22

## **Input zone-selective dysrhythmia in motor thalamus after dopamine depletion**

Kouichi C. Nakamura<sup>1\*</sup>, Andrew Sharott<sup>1</sup>, Takuma Tanaka<sup>2</sup>, and Peter J. Magill<sup>1,3\*</sup>

<sup>1</sup> Medical Research Council Brain Network Dynamics Unit, Nuffield Department of Clinical Neurosciences, University of Oxford, Oxford, OX1 3TH, United Kingdom. <sup>2</sup> Center for Data Science Education and Research, Shiga University, 1-1-1 Banba, Hikone, Shiga 522-8522, Japan. <sup>3</sup> Oxford Parkinson's Disease Centre, University of Oxford, Oxford OX1 3QX, United Kingdom.

\* Correspondence should be addressed to either **Dr. Kouichi C. Nakamura** or **Dr. Peter J. Magill**, MRC Brain Network Dynamics Unit, University of Oxford, Mansfield Road, Oxford, OX1 3TH, UK. E-mail: [kouichi.nakamura@ndcn.ox.ac.uk](mailto:kouichi.nakamura@ndcn.ox.ac.uk) or [peter.magill@ndcn.ox.ac.uk](mailto:peter.magill@ndcn.ox.ac.uk)

**Conflicts of interest statement:** The authors declare no competing financial interests.

## 23 **Abstract**

24 The cerebral cortex, basal ganglia and motor thalamus form circuits important for purposeful  
25 movement. In Parkinsonism, basal ganglia neurons often exhibit dysrhythmic activity during,  
26 and with respect to, the slow (~1 Hz) and beta-band (15–30 Hz) oscillations that emerge in  
27 cortex in a brain state-dependent manner. There remains, however, a pressing need to  
28 elucidate the extent to which motor thalamus activity becomes similarly dysrhythmic after  
29 dopamine depletion relevant to Parkinsonism. To address this, we recorded single-neuron and  
30 ensemble outputs in the ‘basal ganglia-recipient zone’ (BZ) and ‘cerebellar-recipient zone’ (CZ)  
31 of motor thalamus in anesthetized male dopamine-intact rats and 6-OHDA-lesioned rats during  
32 two brain states, respectively defined by cortical slow-wave activity and activation. Two forms  
33 of thalamic input zone-selective dysrhythmia manifested after dopamine depletion: First, BZ  
34 neurons, but not CZ neurons, exhibited abnormal phase-shifted firing with respect to cortical  
35 slow oscillations prevalent during slow-wave activity; secondly, BZ neurons, but not CZ  
36 neurons, inappropriately synchronized their firing and engaged with the exaggerated cortical  
37 beta oscillations arising in activated states. These dysrhythmias were not accompanied by the  
38 thalamic hypoactivity predicted by canonical firing rate-based models of circuit organization in  
39 Parkinsonism. Complementary recordings of neurons in substantia nigra pars reticulata  
40 suggested their altered activity dynamics could underpin the BZ dysrhythmias. Finally,  
41 pharmacological perturbations demonstrated that ongoing activity in the motor thalamus  
42 bolsters exaggerated beta oscillations in motor cortex. We conclude that BZ neurons are  
43 selectively primed to mediate the detrimental influences of abnormal slow and beta-band  
44 rhythms on circuit information processing in Parkinsonism.

45

## 46 **Introduction**

47 Chronic depletion of dopamine from basal ganglia (BG) circuits, as occurs in Parkinson's  
48 disease (PD), profoundly alters the electrical activities of neurons therein. Disturbed BG  
49 outputs should have detrimental consequences for their target neurons in the so-called motor  
50 thalamus (DeLong, 1990; Rubin et al., 2012; Bosch-Bouju et al., 2013). Because motor  
51 thalamic neurons are key effectors of BG outputs, some behavioral impairments in PD likely  
52 stem from their aberrant activity dynamics.

53         Dysrhythmic neuronal activity, *i.e.* abnormal oscillatory firing, is common in basal  
54 ganglia-thalamocortical circuits in Parkinsonism (Hammond et al., 2007; Galvan et al., 2015).  
55 Neuronal dysrhythmia manifests during sleep and waking states (as well as in general  
56 anesthesia), across oscillations with markedly different frequencies. Two exemplary  
57 dysrhythmias are associated with slow oscillations (~1 Hz) and beta-band oscillations (15–30  
58 Hz). After dopamine depletion, many BG neurons inappropriately pattern their firing with  
59 respect to cortical slow oscillations (Magill et al., 2001; Belluscio et al., 2003; Walters et al.,  
60 2007). This might be relevant for the altered slow-wave sleep observed in people with PD  
61 (Zahed et al., 2021). However, it is unclear whether similar dysrhythmias arise in the  
62 Parkinsonian motor thalamus, hindering understanding of the wider functional impact of BG  
63 aberrations.

64         Studies of idiopathic PD suggest that beta-band dysrhythmia in the BG underpins  
65 bradykinesia/rigidity (Kühn et al., 2006, 2009; Ray et al., 2008; Sharott et al., 2014).  
66 Experiments in animals show the emergence of excessive beta rhythms throughout the  
67 dopamine-depleted BG is accompanied by abnormal increases or decreases in the average  
68 firing rates of constituent neurons (Mallet et al., 2008a, 2008b; Avila et al., 2010; Abdi et al.,  
69 2015; Sharott et al., 2017); these firing rate changes corroborate the predictions of the  
70 'direct/indirect pathways' model of BG organization in Parkinsonism (Smith et al., 1998). This  
71 influential model further posits that, because GABAergic BG output neurons are hyperactive,  
72 motor thalamus neurons are hypoactive in Parkinsonism. However, reports suggest

73 hyperactivity (Bosch-Bouju et al., 2014), hypoactivity (Schneider and Rothblat, 1996;  
74 Devergnas et al., 2016), or no change in firing rates in motor thalamus (Pessiglione et al.,  
75 2005; Anderson et al., 2015). One potential confounding factor is that motor thalamus is  
76 organized into discrete ‘input zones’, that is, a basal ganglia-recipient zone (BZ) and a  
77 cerebellar-recipient zone (CZ) (Nakamura et al., 2014). This important consideration aside,  
78 dopamine depletion alters other activity metrics in motor thalamus, including ‘burst firing’,  
79 pairwise correlations and oscillatory firing (Schneider and Rothblat, 1996; Pessiglione et al.,  
80 2005; Bosch-Bouju et al., 2014; Devergnas et al., 2016). Several of these alterations show  
81 that, like the BG, the motor thalamus is dysrhythmic in Parkinsonism. A single study of motor  
82 thalamus in dopamine-depleted rats suggests this might extend to beta-band dysrhythmia  
83 (Brazhnik et al., 2016). Critically, whether exaggerated beta oscillations are accompanied by  
84 changes in BZ neuron firing rates is unknown, as is the extent to which BZ neuronal ensembles  
85 might rhythmically synchronize their firing.

86         Elucidating the functional organization of the motor thalamus as a whole has benefited  
87 from direct comparisons of activity dynamics in the BZ and CZ, in both health and Parkinsonism  
88 (Anderson and Turner, 1991; Vitek et al., 1994; Guehl et al., 2003; Pessiglione et al., 2005;  
89 Ushimaru et al., 2012; Nakamura et al., 2014). The cerebellum might contribute to some  
90 compromised behaviors in PD (Wu and Hallett, 2013; Wichmann, 2019), and it is likely that CZ  
91 neuron activity is altered to some extent in Parkinsonism (Galvan et al., 2015). Because CZ is  
92 innervated by motor cortical regions exhibiting Parkinsonian beta oscillations (Mallet et al.,  
93 2008a, 2008b), dopamine depletion might also induce beta-band dysrhythmia in CZ (Basha et  
94 al., 2014).

95         To resolve these issues, we quantified the brain state-dependent firing of single cells  
96 and neuronal ensembles recorded in the anatomically-defined BZ and CZ of anesthetized  
97 dopamine-intact and dopamine-depleted rats. Our results emphasize that motor thalamus  
98 neurons are not hypoactive in Parkinsonism, but nevertheless engage in abnormal oscillatory  
99 activities in an input zone-selective manner.

100

## 101 **Materials and Methods**

102 All experimental procedures were performed on adult male Sprague Dawley rats (Charles  
103 River) and were conducted in accordance with Animals (Scientific Procedures) Act, 1986  
104 (United Kingdom).

105

106 *6-Hydroxydopamine lesions of midbrain dopamine neurons.* Unilateral 6-hydroxydopamine (6-  
107 OHDA) lesions were induced in 190–250 g rats, as previously detailed (Mallet et al., 2008a,  
108 2008b; Abdi et al., 2015; Sharott et al., 2017). Briefly, the neurotoxin 6-OHDA (hydrochloride  
109 salt; Sigma) was dissolved in 0.9% w/v ice-cold NaCl solution containing 0.02% w/v ascorbate  
110 to a final concentration of 12 mg/ml. Approximately 25 min before the injection of 6-OHDA, all  
111 animals received desipramine (25 mg/kg, i.p.; Sigma) to minimize the uptake of 6-OHDA by  
112 noradrenergic neurons. Anesthesia was induced and maintained with 1.5–3% v/v isoflurane in  
113 O<sub>2</sub>, and animals were placed in a stereotaxic frame (Kopf). Body temperature was maintained  
114 at 37 ± 0.5 °C by a homeothermic heating device (Harvard Apparatus). Under stereotaxic  
115 control, 1 µl of 6-OHDA solution was injected near the medial forebrain bundle (4.1 mm  
116 posterior and 1.2–1.4 mm lateral of bregma, and 7.9 mm ventral to the dura (Paxinos and  
117 Watson, 2007)). Lesions were assessed 14–16 d after 6-OHDA injection by challenge with  
118 apomorphine (0.05 mg/kg, s.c.; Sigma) (Schwartz and Huston, 1996), and were considered  
119 successful when animals made ≥80 net contraversive rotations in 20 min (Sharott et al., 2017).  
120 Electrophysiological recordings (see below) were carried out in the thalamus or substantia  
121 nigra pars reticulata (SNr) ipsilateral to 6-OHDA lesions in anesthetized rats 21–51 d after  
122 surgery.

123

124 *In vivo electrophysiological recording and juxtacellular labeling of individual thalamic neurons.*  
125 Recording and labeling experiments were performed in 36 anesthetized dopamine-intact rats  
126 (300–460 g) and 10 anesthetized 6-OHDA-lesioned rats (275–416 g at the time of recording),  
127 as previously described (Mallet et al., 2008a, 2008b, 2012; Nakamura et al., 2014; Abdi et al.,

128 2015; Sharott et al., 2017). Briefly, anesthesia was induced with 4% v/v isoflurane in O<sub>2</sub>, and  
129 maintained with urethane (1.3 g/kg, i.p.; ethyl carbamate, Sigma), and supplemental doses of  
130 ketamine (30 mg/kg, i.p.; Willows Francis) and xylazine (3 mg/kg, i.p.; Bayer). Wound margins  
131 were infiltrated with local anesthetic (0.5% w/v bupivacaine, Astra). Animals were then placed  
132 in a stereotaxic frame (Kopf). Body temperature was maintained at 37 ± 0.5°C by a  
133 homeothermic heating device (Harvard Apparatus). Electrocorticograms (ECoGs) and  
134 respiration rate were monitored constantly to ensure the animals' wellbeing. The epidural  
135 ECoG was recorded with a 1 mm-diameter screw above the frontal (somatic sensory-motor)  
136 cortex (4.2 mm rostral and 2.0 mm lateral of bregma (Paxinos and Watson, 2007)), and was  
137 referenced against a screw implanted above the ipsilateral cerebellum (Nakamura et al., 2014;  
138 Sharott et al., 2017). Raw ECoG was band-pass filtered (0.3–1500 Hz, –3 dB limits) and  
139 amplified (2000×; DPA-2FS filter/amplifier, NPI Electronic Instruments) before acquisition.  
140 Extracellular recordings of single-unit activity, that is, the action potentials ('spikes') fired by  
141 individual neurons, in the thalamus were made using standard-wall borosilicate glass  
142 electrodes (10–25 MΩ *in situ*; tip diameter 1.0–2.0 μm) containing 0.5 M NaCl solution and  
143 neurobiotin (1.5% w/v; Vector Laboratories, RRID:AB\_2313575). Electrodes were lowered into  
144 the brain under stereotaxic guidance and using a computer-controlled stepper motor (IVM-  
145 1000; Scientifica), which allowed electrode placements to be made with submicron precision.  
146 Electrode signals were amplified (10×) through the bridge circuitry of an Axoprobe-1A amplifier  
147 (Molecular Devices), AC-coupled, amplified another 100×, and filtered at 300–5000 Hz (DPA-  
148 2FS filter/amplifier). The ECoG and single-unit activity were each sampled at 17.9 kHz using  
149 a Power1401 Analog–Digital converter and a PC running Spike2 acquisition and analysis  
150 software (Cambridge Electronic Design). As described previously (Nakamura et al., 2014),  
151 single-unit activity in the thalamus was recorded during cortical slow-wave activity (SWA),  
152 which is similar to activity observed during natural sleep, and/or during episodes of  
153 spontaneous 'cortical activation', which contain patterns of activity that are more analogous to  
154 those observed during the awake, behaving state (Steriade, 2000). It is important to note that  
155 the neuronal activity patterns present under this anesthetic regime may only be qualitatively

156 similar to those present in the unanesthetized brain. Nevertheless, the urethane-anesthetized  
157 animal still serves as a useful model for assessing the impact of extremes of brain state on  
158 functional connectivity within and between the basal ganglia, thalamus and cortex in  
159 dopamine-intact and Parkinsonian animals (Magill et al., 2006; Mallet et al., 2008a, 2008b;  
160 Sharott et al., 2012, 2017; Nakamura et al., 2014). Importantly, excessive beta oscillations  
161 arise (in a brain state-dependent manner) in the basal ganglia and motor cortex of 6-OHDA-  
162 lesioned rats under this anesthetic regimen (Mallet et al., 2008a, 2008b, 2012; Abdi et al.,  
163 2015; Sharott et al., 2017). Cortical activation was occasionally elicited by pinching a hindpaw  
164 for a few seconds. Note that we did not analyze neuronal activity recorded concurrently with  
165 the delivery of these sensory stimuli. Because the analyzed activity was recorded at least  
166 several minutes after the cessation of the brief pinch stimulus, it was also considered to be  
167 spontaneous (Mallet et al., 2008a; Nakamura et al., 2014; Sharott et al., 2017). The animals  
168 did not exhibit a marked change in respiration rate, and did not exhibit a hindpaw withdrawal  
169 reflex, in response to the pinch. Moreover, withdrawal reflexes were not present during  
170 episodes of prolonged cortical activation, thus indicating anesthesia was adequate throughout  
171 recordings.

172 Following electrophysiological recordings, some single thalamic neurons were  
173 juxtacellularly labeled with neurobiotin (Lacey et al., 2007; Nakamura et al., 2014). Briefly,  
174 positive current pulses (2–10 nA, 200 ms, 50% duty cycle) were applied until the single-unit  
175 activity became robustly entrained by the pulses. Single-unit entrainment resulted in just one  
176 neuron being labeled with neurobiotin. Two to six hours after labeling, animals were euthanized  
177 and transcardially perfused with 100 ml of 0.05 M PBS, pH 7.4 (PBS), followed by 300 ml of  
178 4% w/v paraformaldehyde in 0.1 M phosphate buffer, pH 7.4 (PB). Brains were left overnight  
179 in fixative at 4°C, and then stored for 1–3 d in PBS at 4°C before sectioning (see below).  
180 Seventy nine of the thalamic neurons detailed herein were juxtacellularly labeled. These  
181 neurobiotin-labeled neurons were designated “identified” and precisely localized to different  
182 input zones of the motor thalamus (see below). The remaining (unlabeled) thalamic neurons  
183 ( $n = 100$ ) were also included because, using stereotaxy and readouts from the stepper motor,



184 we could accurately extrapolate their locations from those of identified neurons (recorded with  
185 the same glass electrodes in the same animals). Henceforth, we designate these unlabeled  
186 neurons as “extrapolated.” The identified and extrapolated thalamic neurons recorded in  
187 dopamine-intact rats with glass electrodes are those reported in Nakamura et al. (2014), but  
188 their firing properties have now been re-analyzed to address the issues underpinning the  
189 current study; specifically, we have performed new analysis of their firing with respect to  
190 ongoing cortical beta oscillations, and we have statistically compared thalamic neuron firing  
191 rates/patterns in dopamine-intact rats vs. 6-OHDA-lesioned rats.

192

193 *In vivo electrophysiological recording of thalamic and nigral activity with multielectrode arrays.*

194 Extracellular ‘wideband’ (0.1–6,000 Hz) recordings of neuronal activity were simultaneously  
195 made from numerous sites in the motor thalamus or SNr of urethane-anesthetized dopamine-  
196 intact rats ( $n = 7$ ; 295–385 g) and 6-OHDA-lesioned rats ( $n = 11$ ; 300–500 g at the time of  
197 recording) using linear electrode arrays with multiple, spatially-defined recording contacts  
198 (‘silicon probes’; A1x16-10mm-100-400 or A1x16-10mm-100-177, NeuroNexus), as previously  
199 described (Magill et al., 2006; Mallet et al., 2008b; Sharott et al., 2017). Each probe had 16  
200 recording contacts arranged in a single vertical plane, with a contact separation of 100  $\mu\text{m}$ .  
201 Depending on the probe used, each contact had an area of  $\sim 400 \mu\text{m}^2$  (impedance of 0.9–1.2  
202 M $\Omega$ , measured at 1000 Hz) or 177  $\mu\text{m}^2$  (impedance of 1.7–2.0 M $\Omega$ ). To enable *post hoc*  
203 histological verification of recording sites (see below), the backs of the silicon probes were  
204 evenly coated before each experiment with the red fluorescent dye 1,1'-dioctadecyl-3,3,3',3'-  
205 tetramethylindocarbocyanine perchlorate (DiI; D3911, Invitrogen) by application of a 100  
206 mg/ml DiI solution in acetone (Magill et al., 2006). The probe was manually advanced into the  
207 brain using a zero-drift micromanipulator (1760-61, Kopf) under stereotaxic control. The probes  
208 were cleaned after each experiment in a proteolytic enzyme solution (Magill et al., 2006). This  
209 was sufficient to ensure that contact impedances and recording performance were not altered  
210 by probe use and reuse. Monopolar probe signals were recorded using high-impedance unity-  
211 gain operational amplifiers (Advanced LinCMOS, Texas Instruments) and were referenced



212 against a screw implanted above the contralateral cerebellum. After initial amplification,  
213 extracellular signals were further amplified (1000×) and low-pass filtered at 6000 Hz using  
214 programmable differential amplifiers (Lynx-8, Neuralynx). Electrocorticograms were also  
215 recorded as described above. The probe signals and ECoG were each sampled at 17.9 kHz  
216 using a Power1401 converter and a PC running Spike2 software. After the recording sessions,  
217 animals were euthanized and transcardially perfused with fixative (as described above) for  
218 *post hoc* histological analyses.

219  
220 *Microinfusions of GABA into thalamus.* For these experiments, urethane-anesthetized 6-  
221 OHDA-lesioned rats ( $n = 10$ ; 300–500 g at the time of recording) were prepared for ECoG  
222 recordings as described above. A glass micropipette (tip diameter  $\sim 30 \mu\text{m}$ ) containing a 0.5M  
223 GABA solution ( $\gamma$ -aminobutyric acid; 0344, Tocris; dissolved in 0.9% w/v NaCl solution) was  
224 then advanced into the brain using a zero-drift micromanipulator under stereotaxic control.  
225 During sustained periods of cortical activation ( $>100$  s of ensuing beta oscillations in ECoGs),  
226 60 nl of the GABA solution was slowly infused (mean duration [ $\pm$  SEM]:  $24.4 \pm 1.0$  s) into the  
227 motor thalamus using air pressure under manual control. Because the inactivation effects of  
228 such GABA microinfusions typically wear off within a few minutes (Kojima and Doupe, 2009),  
229 we were able to perform repeated infusions (using a minimal interval of 10 min) at one or more  
230 thalamic sites in a single animal; this also allowed us to negate the possibility of a spontaneous  
231 disappearance of cortical beta oscillations. To mark the microinfusion sites at the end of each  
232 experiment, 100–200 nl of a 0.9% w/v NaCl solution containing 0.04% w/v blue fluorescent  
233 microspheres (F8797, Invitrogen) was infused at the same stereotaxic coordinates through the  
234 same micropipette, as described previously (Nakamura and Morrison, 2007). Animals were  
235 then euthanized and transcardially perfused with fixative for *post hoc* histological analyses.

236  
237 *Histology, immunofluorescence and microscopy.* The fixed brains were cut into 50- $\mu\text{m}$  thick  
238 sections in the parasagittal plane on a vibrating microtome (VT1000S; Leica Microsystems),

239 collected in series, and washed in PBS. All the following reagent incubations were performed  
240 at room temperature.

241 To visualize neurobiotin-filled neurons, free-floating sections were washed in PBS and  
242 incubated overnight in Cy3-conjugated streptavidin (1:1000 dilution; PA43001, GE Healthcare)  
243 in “Triton-PBS” (PBS containing 0.3% v/v Triton X-100 [Sigma]). After washing, the sections  
244 were mounted on glass slides, coverslipped, and examined with an epifluorescence  
245 microscope (AxioPhot, Zeiss) to identify the neurobiotin-filled neurons. To delineate thalamic  
246 nuclei and map the location of each identified neuron (see Fig.1), sections containing the  
247 fluorescently-labeled somata were subsequently incubated overnight with a primary antibody  
248 mixture of rabbit anti-vesicular glutamate transporter 2 (VGluT2; 0.4 µg/mL of affinity-purified  
249 IgG; Hioki et al., 2003; a gift from Prof. Takeshi Kaneko, Kyoto University) and mouse anti-  
250 glutamic acid decarboxylase of 67 kDa (GAD67; 2 µg/mL; MAB5406, Millipore, RRID:  
251 AB\_2278725) in Triton-PBS containing 1% v/v donkey serum (Jackson ImmunoResearch; all  
252 the following antibody incubations were carried out with the same buffer). After washing with  
253 Triton-PBS, the sections were incubated for 2–4 h with a mixture of fluorophore-conjugated  
254 secondary antibodies (all raised in donkey): Anti-rabbit IgG (DyLight 649; 1:200; Jackson  
255 ImmunoResearch) and anti-mouse IgG (Alexa Fluor 488; 1:200; Life Technologies). When  
256 necessary, the adjacent sections were incubated with NeuroTrace 500/525 (1:150; N-21480,  
257 Life Technologies), a green fluorescent Nissl stain, in Triton-PBS for 30 min to visualize  
258 cytoarchitecture. After washing, the fluorescently-labeled sections were mounted on glass  
259 slides, coverslipped, and examined with a laser-scanning confocal microscope (LSM710,  
260 Zeiss). To precisely localize the recorded neurons to distinct thalamic nuclei, fluorescent  
261 images of the thalamus around the neurobiotin-filled neurons were taken at a low magnification  
262 with a 5× objective lens (EC Plan-Neofluar, numerical aperture 0.16; Zeiss), a pinhole  
263 thoroughly opened (i.e. in “non-confocal” mode), and a zoom factor of 0.6. Appropriate sets of  
264 laser beams and emission windows were used for Alexa Fluor 488 (excitation 488 nm,  
265 emission 492–544 nm), Cy3 (excitation 543 nm, emission 552–639 nm), and DyLight 649  
266 (excitation 633 nm, emission 639–757 nm). Images of each of the channels were taken

267 separately and sequentially to negate possible “bleed through” of signal across channels.  
268 Images were combined into montages and, when necessary, images from the adjacent  
269 sections were overlaid and aligned using graphic software (Canvas 12, ACD Systems,  
270 RRID:SCR\_014288). The two input zones of the motor thalamus (BZ and CZ) were delineated  
271 on the basis of their distinctive distributions of VGluT2 and GAD67 immunoreactivities  
272 (Kuramoto et al., 2009, 2011, 2015; Nakamura et al., 2014). Only identified neurons located  
273 >50  $\mu\text{m}$  away from the borders of BZ or CZ were analyzed. Extrapolated neurons had to be  
274 located >100  $\mu\text{m}$  away from these borders to be included in the analyses. The dendrites of  
275 thalamocortical neurons in the rat motor thalamus only rarely radiate >200  $\mu\text{m}$  from the parent  
276 somata (Kuramoto et al., 2009, 2015). Thus, most of the proximal dendrites of our neurons  
277 were likely to be confined to just one zone.

278 To determine the locations of silicon probe recording sites (see Figs.6 and 8), tissue  
279 sections were mounted on glass slides in PBS, coverslipped, and examined with a microscope  
280 capable of fluorescent and brightfield imaging (Axio Imager.M2, Zeiss). In those sections  
281 containing Dil signal, images of fluorescence (43 Cy3 filter) and transmitted light were then  
282 taken with a 1.25 $\times$  objective (EC Plan-Neofluar, numerical aperture 0.03; Zeiss) to record the  
283 probe penetration tracks. In many cases, the best quality Dil images were obtained at this  
284 stage, because the subsequent immunofluorescence protocol tended to ‘wash out’ the Dil. At  
285 the start of the immunofluorescence protocol, the Dil-containing sections were unmounted and  
286 then heat treated as a means of antigen retrieval (80°C for 30 min in 10 mM citrate-NaOH  
287 buffer, pH6.0). After washing with PBS, the sections were incubated overnight with a primary  
288 antibody mixture of guinea pig anti-glycine transporter 2 (GlyT2; 1:10,000; AB1773, Merck,  
289 RRID:AB\_90953) and mouse anti-GAD67 (1  $\mu\text{g}/\text{ml}$ ; MAB5406, Millipore, RRID:AB\_2278725)  
290 for the thalamus, or mouse anti-GAD67 antibody alone for the SNr, in Triton-PBS containing  
291 10% v/v donkey serum (Jackson Immunoresearch; all the following antibody incubations were  
292 carried out with the same buffer). After washing with Triton-PBS, the sections were incubated  
293 for 2–4 h with a mixture of fluorophore-conjugated secondary antibodies (all raised in donkey,  
294 1:500, Jackson Immunoresearch): Anti-guinea pig IgG (DyLight 488) and anti-mouse IgG

295 (Alexa Fluor 647) for the thalamus, or anti-mouse IgG alone for the SNr. A laser-scanning  
296 confocal microscope was used to take low-magnification fluorescent images of the thalamus  
297 around the Dil signal, as described above. To correct for tissue shrinkage (<10%) that occurred  
298 during the immunofluorescence protocol, images taken after immunofluorescence were scaled  
299 and aligned with images taken before immunofluorescence, using Canvas 12 software.  
300 Judging from the known stereotaxic distances between probe penetrations in a single plane  
301 (see Figs.6A,A' and 8A,A'), we estimated the difference between the scaling in the tissue *in*  
302 *vivo* during recordings and the scaling in the images before immunofluorescence to be <10%.  
303 The most ventral Dil deposit in each penetration track was considered to be the location of the  
304 probe tip; extrapolating from this, the estimated positions of the probe recording contacts were  
305 plotted on the images of Dil signal and immunofluorescence (see Figs.6A,A' and 8A,A').  
306 Thalamic nuclei/zones and the SNr were identified according to immunofluorescence images  
307 and each recording contact was assigned a location tag for group analyses. When the  
308 estimated locations of probe contacts were on or close to ( $\leq 50$   $\mu\text{m}$ ) the borders between  
309 structures, those recording sites were tagged as "border" and were excluded from group  
310 analyses (see Fig. 6B–D, 8B–D).

311 To determine the sites of GABA microinfusion, we used an anatomical analysis pipeline  
312 similar to that for localizing silicon probes, with the key difference being that glass pipette tracks  
313 were visualized with blue fluorescent microspheres (see Fig.10). Thalamic nuclei/zones were  
314 identified with immunofluorescence for GlyT2, VGluT2 and GAD67, using the primary  
315 antibodies described above and revealed with secondary antibodies that were respectively  
316 conjugated to DyLight 488, Cy3, and Alexa Fluor 647. A laser-scanning confocal microscope  
317 was first used to take low-magnification fluorescent images of the blue microspheres  
318 (excitation 405 nm, emission 409–559 nm) in the tissue. Using the same objective and zoom,  
319 images of DyLight 488, Cy3, and Alexa Fluor 647 signals were then taken sequentially and  
320 separately (as above) to map thalamic structures. After registration of images, the ends of the  
321 pipette tracks (considered to be the locations of the pipette tips) were assigned a location tag.

322

323 *Analysis of ECoGs and basic firing parameters of single units.* Electrocorticogram data from  
324 each recording session were visually inspected and epochs of robust cortical SWA or cortical  
325 activation were selected according to the previously described characteristics of these brain  
326 states (Mallet et al., 2008b; Nakamura et al., 2014; Sharott et al., 2017). A 100 s portion of the  
327 glass electrode or silicon probe data concomitantly recorded during each defined brain state  
328 was isolated and used for statistical analyses. Silicon probe data were high-pass filtered off-  
329 line at 300 Hz (Spike2, finite impulse response filter) to isolate unit activity. Putative single-unit  
330 activity was isolated with standard “spike sorting” procedures (Mallet et al., 2008a), including  
331 template matching, principal component analysis, and supervised clustering (Spike2). Isolation  
332 of a single unit was verified by the presence of a distinct refractory period in the interspike  
333 interval (ISI) histogram. Only neurons in which <1% of all ISIs were <2 ms were analyzed in  
334 this study. Single-unit activity was converted so that each spike was represented by a single  
335 digital event (Spike2). The recorded signals and sorted spike trains were then resampled at 17  
336 kHz with Spike2 and exported to MATLAB (MathWorks, RRID:SCR\_001622) for further  
337 analysis. Spike trains were assumed to be realizations of stationary stochastic point processes.  
338 The mean firing rate (spikes/s) of individual neurons was calculated from the total number of  
339 spikes per 100 s data epoch. Variability of firing was assessed using a metric related to the  
340 coefficient of variation (CV) of the ISI, the mean CV<sup>2</sup> (Holt et al., 1996); the lower the CV<sup>2</sup>  
341 value, the more regular the unit activity.

342

343 *Detection of low-threshold Ca<sup>2+</sup> spike bursts fired by thalamic neurons.* Low-threshold Ca<sup>2+</sup>  
344 spike (LTS) bursts were classified as such using custom Spike2 scripts, according to previously  
345 defined criteria for identifying the LTS bursts in extracellular unit recordings (Lacey et al., 2007;  
346 Nakamura et al., 2014): 1) At least 2 action potentials with an ISI of ≤5 ms but with a preceding  
347 silent period of >100 ms (Lu et al., 1992); and 2) a maximum ISI of 10 ms was used to define  
348 the end of a LTS burst (Fanselow et al., 2001).

349

350 *Detection of the burst firing of SNr neurons.* Analyses of SNr neuron burst firing in lesioned  
351 rats was carried out on single units that displayed high variability in their ISIs ( $CV > 1.0$ ) during  
352 SWA. To detect the onsets and offsets of burst firing, SNr spike trains ( $n = 14$ , from 5 rats)  
353 were first converted into a spike density function (SDF; see Fig.4G) (Szucs, 1998). The point  
354 process data were thus converted to continuous time series (changes in firing probability over  
355 time) by convolution (with MATLAB function `conv`) of a Gaussian kernel with a sigma of 0.051  
356 s (selected so that 95% of spikes are within the range of  $[-3\sigma, 3\sigma]$ ), as prepared by MATLAB  
357 function `normpdf`. Peaks and troughs in the SDF waveform were then detected using MATLAB  
358 function `findpeaks`, using a minimal peak/trough duration of  $2\sigma$  and, for peak detection only,  
359 setting the minimal peak height to be the maxima of the Gaussian kernel. A threshold of the  
360 SDF waveform was then set as the mean of the median peaks and median troughs (Fig.4G).  
361 Within the epochs that the SDF waveform was equal to or higher than this threshold, the spike  
362 events that were closest to the times that the SDF rose above or fell below the threshold were  
363 considered to be the onsets and offsets of bursts, respectively.

364  
365 *Analysis of phase-locked firing of single units, including circular statistics.* To investigate how  
366 the activity of individual thalamic and nigral neurons varied in time with respect to ongoing  
367 cortical network activity, we analyzed the instantaneous phase relationships between  
368 thalamic/nigral spike times and cortical oscillations in specific frequency bands (Sharott et al.,  
369 2012, 2017; Nakamura et al., 2014; Garas et al., 2016). Signal analyses were performed using  
370 MATLAB. Electrocorticogram signals containing robust SWA or cortical activation were initially  
371 downsampled to 1024 Hz (MATLAB function `resample`) and then digitally band-pass filtered  
372 to isolate slow (0.4–1.6 Hz) or beta (15–30 Hz) oscillations, respectively (second- and fifth-  
373 order zero-phase Butterworth filters for slow and beta oscillations, respectively, using MATLAB  
374 function `filtfilt`). Subsequently, the instantaneous phase and power of the ECoG in these  
375 frequency bands were separately calculated from the analytic signal obtained via the Hilbert  
376 transform (Lachaux et al., 1999). In this formalism, peaks in the ECoG oscillations correspond



377 to a phase of  $0^\circ$  and troughs to a phase of  $180^\circ$ . Linear phase histograms, circular phase plots,  
378 and circular statistical measures were calculated using the instantaneous phase values for  
379 each spike. Descriptive and inferential circular statistics were then calculated using the  
380 CircStat toolbox (Berens, 2009) for MATLAB. The phase-locked firing of each neuron with  
381 respect to cortical oscillations was represented by a vector whose angle and length (bound  
382 between 0 to 1; the closer to 1, the more concentrated the angles) were respectively defined  
383 as the circular mean (`circ_mean` of CircStat) and the mean resultant vector length (simply  
384 referred to as 'vector length'; `circ_r` of CircStat) of the instantaneous phase values of spikes.  
385 For the calculation of vector lengths and statistical comparisons, we included only those  
386 neurons that fired  $\geq 40$  spikes during the entire analyzed epoch (100 s). These 'qualifying'  
387 neurons were then tested for significantly phase locked firing (defined as having  $p < 0.05$  in  
388 Rayleigh's Uniformity Test; `circ_rtest` of CircStat). The null hypothesis for Rayleigh's test  
389 was that the spike data were distributed in a uniform manner across/throughout phase. We  
390 and others have previously remarked that the non-sinusoidal nature of some field potential  
391 oscillations, such as the cortical slow oscillation, can confound standard circular statistics,  
392 especially Rayleigh's test (Siapas et al., 2005; Mallet et al., 2008a, 2008b; Sharott et al., 2012;  
393 Nakamura et al., 2014). Thus, for analysis of neuron firing relationships with cortical slow  
394 oscillations, Rayleigh's tests were only carried out after any phase non-uniformities of the slow  
395 oscillations were corrected with the empirical cumulative distribution function (MATLAB `ecdf`)  
396 (Siapas et al., 2005; Nakamura et al., 2014; Abdi et al., 2015; Garas et al., 2016). For each of  
397 the neurons that were significantly phase-locked using these criteria, the mean phase angle  
398 was calculated. Because some datasets did not meet the requirements for parametric testing,  
399 differences in the median phase angles of groups of neurons were tested using the non-  
400 parametric common median test (`circ_cmtest` of CircStat) (Fisher, 1995). The null hypothesis  
401 for the common median test is that all tested groups have the same circular median. The vector  
402 length was used to quantify the level of phase locking around the mean phase for individual  
403 neurons (computed using the angles of each spike) and for populations of neurons (computed  
404 using the mean phase for each neuron). Where single-unit data are displayed in circular plots,



405 lines radiating from the center are the vectors of the preferred phases of firing (with the center  
406 and perimeter of the outer grid circle representing vector lengths of 0 and 1, respectively); thin  
407 lines indicate preferred firing of individual neurons, whereas thick lines indicate population  
408 vectors. The small open circles on the perimeter represent the preferred phases of each  
409 neuron.

410

411 *Extraction and conditioning of background-unit activity signals for time series analyses.* We  
412 analyzed 'background-unit activity' (BUA) signals recorded with silicon probes, a  
413 representation of the summed firing of small, local neuronal populations that is conceptually  
414 distinct from multiunit activity and LFPs (Moran and Bar-Gad, 2010). These BUA signals were  
415 isolated from the wideband recordings made with the probes by initial high-pass filtering off-  
416 line at 300 Hz (Spike2, finite impulse response filter) and the removal of any large-amplitude  
417 action potentials that could potentially distort the signals and bias analyses, as per Moran et al  
418 (Moran et al., 2008) (Fig.6-1A–F). Large-amplitude action potentials were defined as those  
419 exceeding 3 standard deviations of the entire high-pass filtered signal, and data points around  
420 these large action potentials were removed and replaced with another randomly-selected part  
421 of the recording that did not contain similarly large action potentials (MATLAB createBUA  
422 function, a gift from Dr Izhar Bar-Gad). The windows for spike removal were generally set to  
423 –1.5 and +2.0 ms before and after the peak of the large action potentials, with a few exceptions  
424 (2 and 14 out of 673 channels for before and after a spike, respectively) for which wider (up to  
425 –3.0 and +3.0 ms) windows were used to avoid artifacts as assessed by visual inspection. The  
426 BUA signals were then full-width rectified (Journée, 1983; Myers et al., 2003; Moran et al.,  
427 2008) and mean subtracted to remove the DC component that was created by rectification  
428 (Fig.6-1G–I). Finally, the signals were low-pass filtered at 300 Hz (zero-phase shift Butterworth  
429 filter with the order of 3) and downsampled to 1024 Hz (Fig.6-1J–L) before further time series  
430 analyses.

431

432 *Analysis of phase-locked BUA signals, including circular statistics.* To investigate how thalamic  
433 and nigral BUA varied in time with respect to ongoing cortical beta oscillations, we analyzed  
434 ‘phase-averaged waveforms’ of BUA signals, that is, the average of BUA voltage ( $\mu\text{V}$ ) in each  
435 bin (size =  $5^\circ$ ) of the instantaneous phase values of the ECoG band-pass filtered at 15–30 Hz  
436 (zero-phase shift Butterworth filter with the order of 3). A sample vector  $V$  for an individual BUA  
437 signal is defined in the complex plane as the double of an average of complex number-based  
438 vector representations of the instantaneous phase values and the values of BUA signals of  
439 each data point, *i.e.*  $V = \frac{2}{N} \sum_{k=1}^N r_k e^{i\varphi_k}$ , where  $\varphi_k$  and  $r_k$  represent the instantaneous phase  
440 in radians and the value of BUA signal (signed) in  $\mu\text{V}$  for the  $k$ th data point, respectively,  $N$  is  
441 the number of data points, and  $i$  is the imaginary unit. The average was doubled to reflect the  
442 amplitude difference between the positive and negative deflections. If the phase-averaged  
443 waveform of a signal is an ideal sinusoidal curve, the sample vector length  $|V|$  is identical to  
444 the peak-to-peak amplitude in  $\mu\text{V}$ .

445 In order to assess the non-uniformity (*i.e.* significant phase modulation) of BUA signals  
446 in relation to cortical beta oscillations (Figs.7G,H and 9G,H), data points were circularly shifted  
447 in a random manner within each cycle of the beta oscillations (MATLAB `circshift`). This  
448 maintained the waveform of BUA signals within a cycle while randomizing their phase  
449 relationships to ECoG. A similar approach has been used elsewhere (von Nicolai et al., 2014).  
450 We randomly chose 10 BUA signals in BZ or SNr and performed 1000 iterations of random  
451 shifting of each signal to generate a histogram based on an empirical cumulative distribution  
452 function of vector lengths of the shifted data (MATLAB `ecdfhist`). A BUA signal was  
453 considered to be ‘significantly modulated’ in relation to ECoG beta oscillations when the  
454 sample vector length was longer than 99.9% of the sample vector lengths of the shifted data.  
455 Where significantly-modulated BUA signals are displayed in circular plots (Figs.7I and 9I), lines  
456 radiating from the center are the vectors of their preferred phases (with the center and  
457 perimeter of the outer grid circle representing vector lengths of 0 and 1.2  $\mu\text{V}$ , respectively); thin  
458 lines indicate the preferred phase of individual BUA signals, whereas thick lines indicate

459 population vectors. The small open circles on the perimeter represent the preferred phases of  
460 each BUA signal. Group analysis of the sample vectors for BUA signals was carried out as for  
461 group analysis of single-unit data (see above).

462  
463 *Spectral analyses.* Electrocorticograms were downsampled to 1024 Hz before spectral  
464 analyses. Spectral parameters for ECoG and BUA time series were evaluated using Fast  
465 Fourier Transform (FFT). Power and coherence spectra were calculated with MATLAB `pwelch`  
466 and `mscohere` functions, with a FFT size of 5120 for signals recorded during SWA (giving a  
467 frequency resolution of 0.2 Hz) and a FFT size of 1024 for signals recorded cortical activation  
468 (1.0 Hz resolution). The overlap of FFT windows was 50%. For power spectra, each individual  
469 power spectrum was normalized to give “% relative power” unless otherwise stated. This was  
470 achieved by calculating the spectral power in each frequency bin as a percentage of the total  
471 power between 0.4 and 100 Hz (for analysis of SWA) or between 1 and 100 Hz (for analysis  
472 of cortical activation). For statistical comparisons, the sum of power or the average of  
473 coherence across all frequency bins in the band of interest (i.e. 0.4–1.6 Hz or 15–30 Hz) was  
474 calculated, giving a single value for each recording.

475  
476 *Analysis of effects of GABA microinfusion.* We characterized the extent to which microinfusions  
477 of GABA into thalamus influenced ongoing cortical beta oscillations. To visualize changes in  
478 ECoG power at beta frequencies (15–30 Hz) over time and across experiments, we plotted  
479 beta-band power normalized to that in a ‘pre-GABA period’ set as the 100 s immediately before  
480 GABA infusion onset. The effect size (%) of GABA infusion was defined as  $(1 - x) \times 100$  [%],  
481 where  $x$  is the ratio of the total ECoG beta-band power during the 50–150 s after GABA  
482 infusion onset to that during the pre-GABA period.

483  
484 *Statistical analyses.* For each experiment, descriptions of critical variables (e.g., number of  
485 animals, neurons, and other samples evaluated) as well as statistical design can be found in

486 the Results. The Shapiro–Wilk test (`swtest` by Ahmed BenSaïda), was used to judge whether  
487 noncircular datasets were normally distributed ( $p < 0.05$  to reject). Because some data sets  
488 were not normally distributed, we used nonparametric statistical testing for these data  
489 throughout. The Mann–Whitney U test (MWUT; MATLAB `ranksum`) was used for comparisons  
490 of unpaired data. For multiple group comparisons, we performed a Kruskal–Wallis ANOVA on  
491 ranks (MATLAB `kruskalwallis`), with Dunn’s test (MATLAB `multcompare`) for further *post*  
492 *hoc* definition of comparisons. Significance for all statistical tests was set at  $p < 0.05$  (exact  $p$   
493 values are given in the text). Data are represented as group means  $\pm$  SEMs unless stated  
494 otherwise. All box plots in figures show the individual samples (circles), medians, the  
495 interquartile ranges (box), and the non-outlier values closest to the first and third quartiles  
496 (whiskers).  
497

## 498 **Results**

499 The overall aim of this study was to define how the chronic depletion of dopamine, as occurs  
500 in PD, alters the spatial and temporal organization of electrical activity within the two major  
501 input zones of the motor thalamus *in vivo*. Emphasis was placed on defining the extent to which  
502 the action potential firing of BZ and CZ neurons becomes dysrhythmic during, and with respect  
503 to, the slow oscillations (0.4–1.6 Hz) and beta oscillations (15–30 Hz) emerging in cortico-basal  
504 ganglia circuits in a brain state- and dopamine-dependent manner. To address this, we first  
505 recorded individual, identified neurons in the BZ and CZ of anesthetized dopamine-intact rats  
506 and dopamine-depleted (6-OHDA-lesioned) rats during two well-defined and controlled brain  
507 states, slow-wave activity (SWA) and cortical activation. To gain further insights into the activity  
508 dynamics of larger neuronal populations during cortical activation, we sampled background-  
509 unit activities from numerous sites in and around the BZ and CZ using linear multi-electrode  
510 arrays. Further functional context was provided by recording the activities of neurons in the  
511 substantia nigra pars reticulata (SNr), one of the BG output nuclei that targets BZ, as well as  
512 by examining the effects of pharmacological perturbations of the BZ and CZ.

513

### 514 **Dopamine depletion does not decrease the firing rates of neurons in the motor thalamus** 515 **during cortical slow-wave activity or cortical activation**

516 The influential direct/indirect pathways model of BG organization in Parkinsonism  
517 predicts that motor thalamus neurons are hypoactive in Parkinsonism (DeLong, 1990; Smith  
518 et al., 1998). Ongoing brain state provides critical context when testing the validity of the  
519 model's predictions; not only are the firing rates of motor thalamus neurons in dopamine-intact  
520 rodents exquisitely dependent on brain state (Ushimaru et al., 2012; Nakamura et al., 2014),  
521 but it has also been established that dopamine depletion only alters the firing rates of BG  
522 neurons in the expected manner during certain brain states (Abdi et al., 2015; Sharott et al.,  
523 2017; Kovaleski et al., 2020). With this in mind, and throughout this study, we interrogated  
524 neuronal activity dynamics in the motor thalamus in the context of cortical SWA and cortical

525 activation, as verified in simultaneous recordings of ipsilateral frontal electrocorticograms  
526 (Magill et al., 2006; Mallet et al., 2008a, 2008b; Nakamura et al., 2014).

527         Using glass electrodes, we recorded the spontaneous action potential discharges  
528 (spikes) of 137 single units (neurons) in the motor thalamus of dopamine-intact control rats ( $n$   
529 = 36), and 42 neurons in the motor thalamus of 6-OHDA-lesioned rats ( $n$  = 10), during cortical  
530 SWA and/or cortical activation. Of these neurons, 46% (63 of 137) and 38% (16 of 42) were  
531 unequivocally identified, that is, after electrophysiological characterization, they were  
532 juxtacellularly labeled with neurobiotin, and their somata were precisely localized to the BZ or  
533 CZ (Fig.1). As described previously (Kuramoto et al., 2009, 2011; Bosch-Bouju et al., 2014;  
534 Nakamura et al., 2014), we used markers of specific groups of GABAergic axon terminals or  
535 glutamatergic axon terminals (*i.e.* GAD67 and VGluT2, respectively) to define the boundaries  
536 of the BZ and CZ (Fig.1). During periods of robust SWA in ipsilateral frontal cortex, the activity  
537 of identified BZ neurons in both dopamine-intact rats and lesioned rats was typified by a  
538 relatively low mean firing rate (<4 spikes/s) and a propensity to fire discrete bursts of spikes  
539 (Fig.1A,B). These bursts were exemplified by 2–6 spikes fired in rapid succession  
540 (instantaneous intraburst rates of >150 spikes/s), with a progressive decrease in spike  
541 amplitude (Fig.1A,B *insets*). Many of these bursts satisfied the criteria for stereotypical low-  
542 threshold  $\text{Ca}^{2+}$  spike (LTS) bursts (see Materials and Methods). Moreover, spikes were often  
543 fired in time with cortical slow ( $\sim 1$  Hz) oscillations (Fig.1A,B). The activities of neurons in  
544 dopamine-intact and lesioned rats showed clear brain state-dependency. Thus, during cortical  
545 activation, which was exemplified by a relative paucity of cortical slow oscillations (and, in the  
546 case of lesioned rats only, the emergence of exaggerated beta oscillations), the activity of  
547 identified BZ neurons in both dopamine-intact and lesioned rats was typified by relatively high  
548 mean firing rates (>10 spikes/s) and a “tonic” irregular firing pattern (Fig.1C,D). Neurons in BZ  
549 seldom fired LTS bursts during cortical activation. Importantly, the activity of identified CZ  
550 neurons was qualitatively similar to that of BZ neurons, irrespective of brain state and whether  
551 recordings were made in dopamine-intact rats and or in lesioned rats (Fig.1E–H).

552 We next quantitatively assessed whether dopamine depletion altered the basic firing  
553 properties of BZ neurons or CZ neurons. For these analyses, we pooled together all identified  
554 and “extrapolated” neurons, that is, the unlabeled neurons whose locations could be accurately  
555 extrapolated from those of identified neurons (see Materials and Methods). We first considered  
556 thalamic activity recorded during cortical SWA (Fig.2A–F). On average, the firing rates of BZ  
557 neurons in lesioned rats ( $2.76 \pm 0.22$  spikes/s [mean  $\pm$  SEM];  $n = 13$  neurons) were slightly,  
558 but significantly, higher ( $p = 0.002$ , MWUT; Fig.2A) than those of BZ neurons in dopamine-  
559 intact rats ( $1.88 \pm 0.06$  spikes/s;  $n = 48$  neurons). In contrast, the firing rates of CZ neurons in  
560 lesioned rats ( $2.51 \pm 0.41$  spikes/s;  $n = 14$  neurons) were similar ( $p = 0.149$ , MWUT; Fig.2B)  
561 to those of CZ neurons in dopamine-intact rats ( $1.93 \pm 0.09$  spikes/s;  $n = 80$  neurons).  
562 Dopamine depletion did not alter the firing variability (as indexed by CV2 measures) of either  
563 BZ neurons ( $p = 0.679$ , MWUT; Fig.2C) or CZ neurons ( $p = 0.061$ , MWUT; Fig.2D). During  
564 SWA, all motor thalamus neurons fired numerous LTS bursts (Fig.1); on average, ~75% of all  
565 spikes fired by BZ and CZ neurons during SWA occurred within LTS bursts (Fig.2E,F).  
566 Dopamine depletion did not alter the propensities of BZ and CZ neurons to fire spikes in LTS  
567 bursts ( $p = 0.465$  and  $0.342$  for BZ and CZ neurons, respectively, MWUT; Fig.2E,F). We then  
568 considered thalamic activity recorded during cortical activation (Fig.2G–L). On average, the  
569 firing rates of BZ neurons in lesioned rats ( $20.48 \pm 2.66$  spikes/s;  $n = 11$  neurons) were similar  
570 ( $p = 0.237$ , MWUT; Fig.2G) to those of BZ neurons in dopamine-intact rats ( $16.49 \pm 0.52$   
571 spikes/s;  $n = 32$  neurons). In contrast, the firing rates of CZ neurons in lesioned rats ( $24.01 \pm$   
572  $2.29$  spikes/s;  $n = 8$  neurons) were significantly higher ( $p = 0.013$ , MWUT; Fig.2H) than those  
573 of CZ neurons in control rats ( $16.39 \pm 0.70$  spikes/s;  $n = 30$  neurons). Dopamine depletion  
574 increased the firing variability of BZ neurons ( $p = 0.006$ , MWUT; Fig.2I), but did not alter the  
575 firing variability of CZ neurons ( $p = 0.508$ , MWUT; Fig.2J). During cortical activation, the  
576 proportions of all spikes included in LTS bursts were very low for neurons in both input zones  
577 ( $0.23 \pm 0.15\%$  and  $0.07 \pm 0.02\%$  for BZ neurons in lesioned and dopamine-intact rats,  
578 respectively;  $0.10 \pm 0.08\%$  and  $0.07 \pm 0.03\%$  for CZ neurons in lesioned and dopamine-intact  
579 rats; Fig.2K,L). Dopamine depletion did not alter the propensities of BZ and CZ neurons to fire



580 LTS bursts during cortical activation ( $p = 0.171$  and  $0.543$  for BZ and CZ neurons, respectively,  
581 MWUT; Fig.2K,L).

582 In summary, these recordings of individual neurons accurately localized to one or the  
583 other input zone of the motor thalamus show that the firing rates of BZ neurons are not  
584 abnormally decreased after chronic dopamine depletion. These data also suggest that, when  
585 carefully controlling for two brain states, dopamine depletion does not increase the prevalence  
586 of LTS burst firing in either the BZ or CZ.

587

### 588 **The firing of BZ neurons, but not CZ neurons, is aberrantly phase-locked to cortical** 589 **slow oscillations after dopamine depletion**

590 Dopamine depletion can alter the patterning of BG neuron discharges during, and with respect  
591 to, the stereotyped cortical slow oscillation (Magill et al., 2001; Mallet et al., 2006; Walters et  
592 al., 2007; Zold et al., 2012; Abdi et al., 2015). We addressed whether this also holds true for  
593 motor thalamus neurons. During SWA, the normalized power of ECoG slow oscillations  
594 (defined as 0.4–1.6 Hz Nakamura et al., 2014; Sharott et al., 2017) simultaneously recorded  
595 with BZ neurons was on average similar between dopamine-intact rats and lesioned rats ( $p =$   
596  $0.052$ , MWUT; Fig.3A). The power in ECoGs recorded with CZ neurons was also similar across  
597 animal groups ( $p = 0.920$ , MWUT; Fig.3A). The power of slow oscillations in single-unit  
598 activities in BZ was on average slightly higher in dopamine-intact rats than in lesioned rats ( $p$   
599  $= 0.035$ , MWUT; Fig.3B), as was the coherence between ECoGs and BZ units at slow  
600 oscillation frequencies ( $p = 0.046$ , MWUT; Fig.3C). The equivalent metrics in CZ were  
601 unaffected by dopamine depletion ( $p = 0.441$  for CZ units, MWUT; Fig.3B;  $p = 0.241$  for ECoG–  
602 CZ coherence, MWUT; Fig.3C). These results suggest that dopamine depletion selectively  
603 alters the relationship between activities in frontal cortex and BZ. To test this further, we used  
604 the Hilbert transform to analyze the instantaneous phase of the spiking of thalamic neurons  
605 with respect to cortical slow oscillations at 0.4–1.6 Hz (Nakamura et al., 2014; Abdi et al., 2015;  
606 Garas et al., 2016; Sharott et al., 2017). On average, BZ neurons in dopamine-intact rats  
607 preferentially fired at the ascending phase of cortical slow oscillations (Fig.3D), that is, at

608 around the phase that cortical neurons transition from silence to coordinated firing (Sakata and  
609 Harris, 2009; Chauvette et al., 2010). This finely-timed firing of BZ neurons was also evident  
610 in their individual phase histograms (Fig.3E). Circular statistical analyses revealed that the  
611 spikes of all BZ neurons ( $n = 48$ ) were significantly phase-locked to the slow oscillations ( $p <$   
612  $0.05$ , Rayleigh's Uniformity Test). Circular plots of the preferred phases of these phase-locked  
613 BZ neurons also demonstrated their strong tendency to fire at the ascending phase of the slow  
614 oscillations (Fig.3F); the mean angle of the preferred firing phases for the BZ neuron group  
615 was  $283.4 \pm 3.8^\circ$  (Fig.3J). Dopamine depletion profoundly disturbed the temporal coupling  
616 (phase locking) of BZ neuron firing to cortical slow oscillations (Fig.3D–F,J). On average, and  
617 when compared to BZ neurons in dopamine-intact rats, the peak of activity of BZ neurons in  
618 lesioned rats appeared smaller and broader in the linear phase histogram, indicating weaker  
619 and more variable phase locking as a population after dopamine depletion (Fig.3D).  
620 Furthermore, most BZ neurons in lesioned rats preferentially fired at the descending phase of  
621 cortical slow oscillations (Fig.3D–F), with a mean angle of firing of  $31.7 \pm 15.4^\circ$  for the BZ  
622 neuron group (Fig.3J). Accordingly, dopamine depletion resulted in a large ( $\sim 100^\circ$ ) and  
623 significant ( $p = 0.001$ , common median test) shift in the mean angles of firing of phase-locked  
624 BZ neurons. In stark contrast, dopamine depletion did not alter the temporal coupling of CZ  
625 neuron firing to cortical slow oscillations (Fig.3G–J). The similarities in the firing of CZ neurons  
626 in dopamine-intact and lesioned rats were evident in linear phase histograms (Fig.3G,H) and  
627 circular plots (Fig.3I,J). Moreover, the mean angles of firing of phase-locked CZ neurons in  
628 control and lesioned rats were not shifted ( $p = 0.560$ , common median test). When comparing  
629 vector lengths (Fig.3K), which indicate how spiking activity of single neurons is concentrated  
630 around a given preferred phase, it was evident that BZ neurons in dopamine-intact rats had  
631 more consistent phase-locked firing than neurons in the other three groups, which were all  
632 similar ( $p = 6.30 \times 10^{-8}$ ,  $\chi^2 = 36.35$ , Kruskal-Wallis ANOVA;  $p = 0.004$  for BZ intact vs BZ  
633 lesioned,  $p = 4.18 \times 10^{-8}$  for BZ intact vs CZ intact,  $p = 0.008$  for BZ intact vs CZ lesioned,  $p =$   
634  $1.00$  for BZ lesioned vs CZ intact,  $p = 1.00$  for BZ lesioned vs CZ lesioned,  $p = 1.00$  for CZ  
635 intact vs CZ lesioned, *post hoc* Dunn's tests).

636 Together, these data show that the phase-locked firing of BZ neurons, but not CZ  
637 neurons, is impaired and inappropriately timed with respect to cortical slow oscillations after  
638 dopamine depletion. As such, these results collectively define one manifestation of an input  
639 zone-selective dysrhythmia in motor thalamus.

640

641 **The firing of SNr neurons is aberrantly phase-locked to cortical slow oscillations after**  
642 **dopamine depletion**

643 GABAergic SNr neurons innervate the BZ (Kuramoto et al., 2011), and their firing during SWA  
644 is altered by dopamine depletion (Belluscio et al., 2003; Tseng et al., 2005; Walters et al.,  
645 2007), together raising the possibility that the dysrhythmic firing of BZ neurons (Fig.3) is  
646 mediated by SNr neurons. However, it is unclear whether the timing of BZ and SNr activity  
647 would support such a relationship. To address this, we used silicon probes to record single-  
648 unit activity in the SNr of dopamine-intact and 6-OHDA-lesioned rats during SWA (Fig.4).  
649 Although the power of ECoG slow oscillations simultaneously recorded with SNr neurons was  
650 slightly lower in lesioned rats ( $p = 0.016$ , MWUT; Fig.4A), the power of slow oscillations in SNr  
651 unit activities was greatly elevated in lesioned rats ( $p < 10^{-9}$ , MWUT; Fig.4B). Moreover,  
652 qualitative inspection of SNr unit activities (Fig.4D), and analyses of phase histograms  
653 (Fig.4E,F), suggested that the temporal coupling of SNr neuron firing to cortical slow  
654 oscillations was markedly stronger in lesioned rats. Consistent with this, the firing of 88.4% of  
655 SNr neurons (38 of 43) in lesioned rats was significantly phase-locked ( $p < 0.05$ , Rayleigh's  
656 Uniformity Test) to cortical slow oscillations, whereas only 48.7% of SNr neurons (18 of 37)  
657 were significantly phase-locked in dopamine-intact rats (Fig.4J,K). Moreover, the vector  
658 lengths of individual SNr neurons were longer in lesioned rats ( $p = 5.06 \times 10^{-5}$ , MWUT; Fig.4L),  
659 demonstrating that SNr neuron firing is more consistently phase-locked after dopamine  
660 depletion. These alterations in temporal coupling were not associated with changes in SNr  
661 neuron firing rates during SWA ( $18.81 \pm 1.72$  and  $21.12 \pm 0.21$  spike/s in lesioned and  
662 dopamine-intact rats, respectively;  $p = 0.091$ , MWUT).

663 On average, SNr neurons in both dopamine-intact and lesioned rats tended to fire just  
664 after the peak of cortical slow oscillations (Fig.4E,J,K); the mean angles of firing were  $22.4 \pm$   
665  $11.2^\circ$  and  $28.1 \pm 9.1^\circ$ , respectively, and they were similar ( $p = 0.501$ , common median test;  
666 Fig.4K). Given that BZ neurons in lesioned rats fired at a mean angle of  $31.7 \pm 15.4^\circ$  (Fig.3J),  
667 the average peak activity of SNr neurons would appear poorly timed to influence (inhibit) BZ  
668 neurons and shift their preferred phase of firing. However, we noted that some SNr neurons  
669 fired in a phasic ‘bursting’ manner, rhythmically alternating between intense firing and near  
670 quiescence (Fig.4F), rather than quasi-sinusoidal fluctuations in firing. To investigate this, we  
671 first defined the bursts fired by a group of SNr neurons ( $n = 14$ ), chosen for their high firing  
672 variability ( $CV \geq 1.0$ ), and analyzed the timing of their burst onsets and offsets with respect to  
673 cortical slow oscillations (Fig.4G–I). Comparisons of linear phase histograms revealed that SNr  
674 burst onsets preferentially occurred just before the peak of cortical slow oscillations, and  
675 overlapped with reductions in BZ neuron activity, whereas SNr burst offsets preferentially  
676 occurred during the descending phase of cortical slow oscillations, and overlapped with the  
677 primary peak of BZ neuron activity (Fig.4H,I). These correlations suggest that, upon dopamine  
678 depletion, the emergence of aberrantly phase-locked burst firing in SNr is a valid candidate for  
679 mediating the phase shift and dysrhythmia of BZ neurons.

680

681 **The firing of individual BZ neurons, but not CZ neurons, is often aberrantly phase-**  
682 **locked to exaggerated cortical beta oscillations after dopamine depletion**

683 We next examined the extent to which the firing of individual neurons (identified and  
684 extrapolated) in motor thalamus is altered with respect to the cortical beta-frequency (15–30  
685 Hz) oscillations present during cortical activation (Fig.5; also see Fig.1C,D,G,H). In line with  
686 previous reports (Mallet et al., 2008a, 2008b; Sharott et al., 2017), the ECoGs simultaneously  
687 recorded with thalamic neurons in 6-OHDA-lesioned rats showed significantly exaggerated  
688 beta oscillations as compared to those recorded in dopamine-intact rats ( $p = 6.08 \times 10^{-6}$  for  
689 ECoGs with BZ neurons,  $p = 3.67 \times 10^{-4}$  for CZ neurons, MWUT; Fig.5A; also see Fig.1D,H).  
690 The power spectra of spikes fired by BZ neurons, but not CZ neurons, displayed significantly

691 enhanced and prominent beta oscillations after dopamine depletion ( $p = 4.55 \times 10^{-5}$  for BZ  
692 neurons in lesioned vs dopamine-intact rats,  $p = 0.291$  for CZ neurons, MWUT; Fig.5B). Beta-  
693 band coherence between ECoGs and BZ neurons was significantly augmented after dopamine  
694 depletion ( $p = 1.03 \times 10^{-6}$ , MWUT; Fig.5C), but this was not the case for CZ neurons ( $p = 0.060$ ,  
695 MWUT; Fig.5C). Phase histograms further suggested that the temporal coupling of BZ neuron  
696 firing to cortical beta oscillations was markedly stronger in lesioned rats (Fig.5D,E). Consistent  
697 with this, the firing of all BZ neurons (11 of 11) in lesioned rats was significantly phase-locked  
698 ( $p < 0.05$ , Rayleigh's Uniformity Test) to cortical beta oscillations, whereas only 6.3% of BZ  
699 neurons (2 of 32) were significantly phase-locked in dopamine-intact rats. Changes in the  
700 temporal coupling of CZ neurons to cortical beta oscillations were less marked (Fig.5F,G), with  
701 minor proportions of CZ neurons exhibiting significantly phase-locked firing (3.3% [1 of 30] and  
702 37.5% [3 of 8] of CZ neurons in dopamine-intact and lesioned rats, respectively). The  
703 disparities between BZ and CZ were unlikely to have arisen from systematic differences in  
704 cortical activity; the power of ECoG beta oscillations recorded with BZ or CZ neurons in  
705 lesioned rats was similar ( $p = 0.075$ , MWUT). In lesioned rats, BZ neurons tended to discharge  
706 during the descending phase of cortical beta oscillations (Fig.5D), with a mean angle of firing  
707 of  $138.8 \pm 12.3^\circ$  for the group (Fig.5H). When comparing the vector lengths of individual  
708 neurons (Fig.5I), BZ neurons in lesioned rats had more consistent phase-locked firing than  
709 neurons in the other three groups, which were all similar ( $p = 2.57 \times 10^{-6}$ ,  $\chi^2 = 28.70$  Kruskal-  
710 Wallis ANOVA;  $p = 1.77 \times 10^{-6}$  for BZ intact vs BZ lesioned,  $p = 1.00$  for BZ intact vs CZ intact,  
711  $p = 0.977$  for BZ intact vs CZ lesioned,  $p = 7.96 \times 10^{-6}$  for BZ lesioned vs CZ intact,  $p = 0.007$   
712 for BZ lesioned vs CZ lesioned,  $p = 0.997$  for CZ intact vs CZ lesioned, *post hoc* Dunn's tests).

713 Taken together, these data show that individual BZ neurons, but not CZ neurons, tend  
714 to inappropriately engage with the exaggerated cortical beta oscillations that arise during  
715 activated brain states after dopamine depletion. As such, these results collectively reveal a  
716 second manifestation of an input zone-selective dysrhythmia in motor thalamus.

717

718 **Neuronal ensemble activity in the BZ, but not CZ, is aberrantly synchronized and phase-**  
719 **locked to exaggerated cortical beta oscillations after dopamine depletion**

720 To gain insight into whether and how alterations in motor thalamus activity occurring after  
721 dopamine depletion extended to the collective outputs from larger ensembles of neurons, we  
722 analyzed silicon probe recordings of background-unit activity (BUA) that represents the spike  
723 firing of many neurons around the probe contacts (Moran et al., 2008; Moran and Bar-Gad,  
724 2010). The BUA signals were extracted from wide-band recordings (Fig.6-1) and then used as  
725 continuous time series for spectral and circular statistical analyses. The use of Dil-coated linear  
726 probes with multiple recording contacts of known separation, together with *post hoc* anatomical  
727 verification of probe placement, allowed us to map the spatial profile of ensemble activity  
728 across discrete regions of BZ and CZ (Fig.6A,A'). Simultaneous recordings of BUA signals  
729 across the two thalamic input zones in lesioned rats showed that BZ ensemble activity, but not  
730 CZ ensemble activity, was often conspicuously modulated in time with ongoing cortical beta  
731 oscillations (Fig.6B). Accordingly, some BUA signals in BZ, but not CZ, also exhibited  
732 prominent beta oscillations (Fig.6C) and clear beta-band coherence with ECoGs (Fig.6D). Of  
733 note, the pronounced temporal coupling, power and coherence of BUA signals at beta  
734 frequencies was not always present across the whole BZ, such that focal 'hot spots' were  
735 instead evident (Fig.6B–D).

736 We extended the analysis of thalamic BUAs to quantitative comparisons across  
737 dopamine-intact and lesioned rats ( $n = 6$  and  $7$  rats, respectively) (Fig.7). Among the power  
738 spectra of thalamic BUAs, only those recorded in the BZ of lesioned rats showed a  
739 conspicuous peak at beta frequencies (Fig.7B). Accordingly, beta-band power in BZ BUA  
740 signals was significantly increased after dopamine depletion ( $p = 2.87 \times 10^{-8}$ , MWUT). Similarly,  
741 the beta-band coherence between thalamic BUA signals and ECoGs was significantly  
742 increased for BZ, but not for CZ, after dopamine depletion ( $p = 9.99 \times 10^{-14}$  for BZ,  $p = 0.444$  for  
743 CZ, MWUT; Fig.7C). These disparities were unlikely to have arisen from systematic differences  
744 in cortical activity; the power of ECoG beta oscillations recorded with BZ or CZ BUA signals in  
745 lesioned rats was similar ( $p = 0.920$ , MWUT; Fig.7A). Beta-band coherence between pairs of



746 BZ BUA signals was significantly increased after dopamine depletion ( $p = 2.08 \times 10^{-23}$ , MWUT;  
747 Fig.7D). However, this was not the case for pairs of CZ BUA signals ( $p = 0.901$ , MWUT;  
748 Fig.7E), nor for pairs made up of one BZ signal and one CZ signal ( $p = 0.834$ , MWUT; Fig.7F).  
749 As noted above, not all BZ BUA signals showed clear peaks in power or coherence at beta  
750 frequencies after dopamine depletion (Fig.6). Thus, to characterize the phase relationships  
751 between BZ BUA and cortical beta oscillations in lesioned rats, we first selected the BZ BUA  
752 signals with sample vector lengths longer than the 99.9th percentile of the sample vector  
753 lengths of the shuffled data (see Materials and Methods). When the amplitudes of these  
754 'significantly modulated' BUA signals ( $n = 35$ ) were plotted with respect to cortical beta  
755 oscillations, it was evident that BZ ensemble activity tended to increase during the descending  
756 phase (Fig.7G,H). On average, these BZ BUA signals showed a preferred mean angle of  $123.4$   
757  $\pm 7.2^\circ$  (Fig.7I), which is similar ( $p = 0.300$ , common median test) to the value we obtained for  
758 individual neurons in BZ ( $138.8 \pm 12.3^\circ$ ; Fig.5H). The power spectrum of the significantly-  
759 modulated BZ BUA signals had a prominent peak in the beta band (Fig.7J), as did their  
760 coherence spectrum with ECoGs (Fig.7K).

761 In summary, these data collectively demonstrate that, after dopamine depletion,  
762 neuronal ensembles in the BZ, but not CZ, inappropriately synchronize their outputs at beta  
763 frequencies during cortical activation. Thus, input zone-selective dysrhythmia in motor  
764 thalamus also manifests at the level of population activity.

765

### 766 **Neuronal ensemble activity in the SNr is aberrantly synchronized and phase-locked to** 767 **exaggerated cortical beta oscillations after dopamine depletion**

768 To provide further context for the dysrhythmic firing of BZ neurons in relation to exaggerated  
769 beta oscillations, we next tested whether neuronal ensemble activity in SNr during cortical  
770 activation was similarly altered by dopamine depletion (Figs.8 and 9). Following the  
771 experimental approach used to investigate motor thalamus (Figs.6 and 7), the use of Dil-  
772 coated silicon probes, together with *post hoc* anatomical verification of probe placement,  
773 allowed us to map the spatial profile of activity across discrete regions of SNr (Fig.8A,A').



774 Simultaneous recordings of BUA signals at multiple sites within the SNr of lesioned rats  
775 showed that ensemble activity was often conspicuously modulated in time with ongoing cortical  
776 beta oscillations (Fig.8B). Some SNr BUA signals also exhibited prominent beta oscillations  
777 (Fig.8C) and clear beta-band coherence with ECoGs (Fig.8D). The pronounced temporal  
778 coupling, power and coherence of BUA signals at beta frequencies typically manifested as  
779 focal hot spots (Fig.8B–D).

780 Quantitative comparisons of SNr BUA signals recorded in dopamine-intact and  
781 lesioned rats ( $n = 5$  and  $5$  rats, respectively) revealed several important differences (Fig.9).  
782 The power spectrum of SNr BUA signals in lesioned rats, but not dopamine-intact rats, showed  
783 a prominent peak at beta frequencies (Fig.9B). Accordingly, beta-band power in SNr BUA  
784 signals was significantly increased after dopamine depletion ( $p = 8.19 \times 10^{-9}$ , MWUT). The beta-  
785 band coherence between SNr BUA signals and ECoGs significantly increased after dopamine  
786 depletion ( $p = 5.41 \times 10^{-31}$ , MWUT; Fig.9C), as did the beta-band coherence between pairs of  
787 SNr BUA signals ( $p = 3.97 \times 10^{-50}$ , MWUT; Fig.9D). Because not all SNr BUA signals showed  
788 clear peaks in power or coherence at beta frequencies after dopamine depletion (Fig.8), we  
789 again selected a set of significantly-modulated SNr BUA signals ( $n = 92$ ) for analyses of phase  
790 relationships between SNr ensemble activity and cortical beta oscillations in lesioned rats  
791 (Fig.9G–I). Ensemble activity in SNr tended to increase during the ascending phase of cortical  
792 beta oscillations (Fig.9G,H), with, on average, a preferred mean angle of  $266.1 \pm 2.3^\circ$  (Fig.9I).  
793 The power spectrum of the significantly-modulated SNr BUA signals had a prominent peak in  
794 the beta band (Fig.9J), as did their coherence spectrum with ECoGs (Fig.9K). On comparing  
795 the rhythmic modulation (preferred phases) of SNr BUA signals (Fig.9H,I) and BZ BUA signals  
796 (Fig.7H,I), an ‘anti-phase’ relationship was apparent, such that peaks in SNr ensemble activity  
797 were approximately timed with troughs in BZ ensemble activity, and *vice versa*. We also  
798 isolated single units from the same probe recordings in SNr. Beta-band coherence between  
799 SNr single units and ECoGs was significantly augmented after dopamine depletion ( $p =$   
800  $6.03 \times 10^{-6}$ , MWUT; Fig.9E). The firing of 52% of SNr single units (24 of 46) in lesioned rats was  
801 significantly phase-locked ( $p < 0.05$ , Rayleigh’s Uniformity Test) to cortical beta oscillations,

802 whereas none of the SNr single units (0 of 23) in dopamine-intact rats were similarly phase-  
803 locked. On average, SNr single units in lesioned rats fired at a preferred mean angle of  $221.9$   
804  $\pm 11.1^\circ$  (Fig.9F). These alterations in temporal coupling were not associated with changes in  
805 SNr neuron firing rates during cortical activation ( $29.25 \pm 2.06$  and  $28.08 \pm 0.32$  spike/s in  
806 lesioned and dopamine-intact rats, respectively;  $p = 0.736$ , MWUT).

807 In summary, these data demonstrate that, after dopamine depletion, neuronal  
808 ensembles in the SNr inappropriately synchronize their outputs at beta frequencies during  
809 cortical activation. They further suggest that aberrantly phase-locked firing of SNr neurons is  
810 a valid candidate for mediating the related dysrhythmia of BZ neurons.

811

## 812 **GABA infusions into motor thalamus reduce Parkinsonian beta oscillations in motor** 813 **cortex**

814 Excessively synchronized beta-frequency output from the BZ (Figs.5-7) might be causally  
815 important for the expression of abnormal beta oscillations in the BZ's principal target, namely  
816 the motor cortex. We reasoned that, if this were the case, then suppressing BZ neuron activity  
817 would reduce the power of abnormal beta oscillations in motor cortex. To test this, we recorded  
818 ECoG beta oscillations during cortical activation in lesioned rats ( $n = 10$ ) before, during and  
819 after infusions of a small volume (60 nl) of GABA solution (0.5 M) via a glass pipette inserted  
820 into the motor thalamus (Fig.10). We chose to microinfuse GABA (rather than other agonists  
821 of GABA receptors) because the inactivation effects of similarly small infusions of GABA  
822 typically abate within a few minutes (Kojima and Doupe, 2009); this in turn allowed us to  
823 perform repeated infusions (using a minimum interval of 10 mins) at one or more thalamic sites  
824 in a single animal (Fig.10A,B). Using this approach, we thus aimed to rapidly, but transiently,  
825 quash or otherwise perturb neuronal activity in a small volume of thalamic tissue. By marking  
826 the trajectories of the same glass micropipettes with synthetic fluorescent markers, we were  
827 able to accurately localize the GABA infusion sites to the BZ or CZ (Fig.10C). Our approach is  
828 to be contrasted with that used in a previous study (Brazhnik et al., 2016), where much larger  
829 volumes ( $\sim 10\times$ ) of the longer-lasting GABA<sub>A</sub> receptor agonist muscimol were injected via much

830 larger cannulas ( $>10\times$  in diameter) into the ventral medial (VM) nucleus and thereabouts, with  
831 the effects of drug injection being quantified hours after the event.

832 Brief microinfusions ( $24.4 \pm 1.0$  s) of GABA at sites *post hoc* localized to BZ caused  
833 rapid (within  $\sim 25$  s of infusion onset) and reproducible decreases in the power of cortical beta  
834 oscillations (Fig.10A–C). On average, the nadir in cortical beta power occurred around 100 s  
835 from the onset of GABA infusions at BZ sites ( $n = 32$ ), after which beta power steadily  
836 increased (Fig.10D). Effect size, defined as the percentage reduction in cortical beta power at  
837 50–150 s after GABA infusion as compared to power during the 100 s immediately before  
838 infusion, was on average  $\sim 50\%$  for infusions at BZ sites (Fig.10D–F). That said, effect sizes  
839 across different BZ infusions sites and all animals were highly variable (Fig.10D–F), which  
840 might relate to the focal hot spot expression of beta oscillations in the BZ (see Fig.6). Infusion  
841 of GABA at CZ sites ( $n = 23$ ) also led to reductions in cortical beta power, with an average time  
842 course of effect that was akin to that after infusions at BZ sites (Fig.10D). However, compared  
843 to infusions at BZ sites, the effect sizes of infusions at CZ sites were on average significantly  
844 smaller ( $p = 0.0297$ , MWUT; Fig.10E). As a further distinction, effects sizes of  $>60\%$  were  
845 limited to GABA infusions made at BZ sites (Fig.10E,F).

846 Taken together, these pharmacological perturbation analyses suggest that ongoing  
847 activity in the motor thalamus is permissive for exaggerated beta oscillations in motor cortex,  
848 with output from the BZ being of special importance for the maintenance of these pathological  
849 cortical rhythms.

850

## 851 **Discussion**

852 Here, we elucidate how chronic dopamine depletion alters the temporal dynamics of electrical  
853 activity within the two major input zones of motor thalamus *in vivo*. Our data demonstrate that  
854 distinct, brain state-dependent manifestations of dysrhythmia selectively emerge within the  
855 basal ganglia-recipient zone in Parkinsonism.

856

### 857 **Neuronal firing rates in Parkinsonism**

858 The direct/indirect pathways model predicts that motor thalamus neurons are hypoactive in  
859 Parkinsonism (DeLong, 1990; Smith et al., 1998; Galvan et al., 2015). Our recordings of  
860 individual neurons accurately localized to the BZ and CZ do not support this prediction.  
861 Previous work in anesthetized rats shows that dopamine depletion only alters the firing rates  
862 of some BG neurons in the expected manner during certain brain states (Belluscio et al., 2003;  
863 Abdi et al., 2015; Sharott et al., 2017). We determined that, irrespective of two extreme brain  
864 states, the spontaneous firing rates of BZ neurons were not abnormally decreased. Our results  
865 agree with electrophysiological studies of BZ neurons in awake dopamine-intact and  
866 Parkinsonian monkeys (Pessiglione et al., 2005; Kammermeier et al., 2016), suggesting they  
867 generalize beyond anesthesia and across species. *Ex vivo* BZ neurons exhibit augmented  
868 'rebound' LTS bursting after dopamine depletion (Bichler et al., 2021). Our data show this does  
869 not manifest as altered propensities to fire spikes in LTS bursts *in vivo*. That BZ neurons were  
870 not hypoactive tallies with our observation that SNr neurons were not hyperactive after  
871 dopamine depletion; the latter is a recurring finding in awake and anesthetized rodents (Tseng  
872 et al., 2005; Walters et al., 2007; Lobb and Jaeger, 2015; Willard et al., 2019). We observed,  
873 however, that CZ neurons had increased firing rates during cortical activation, adding to  
874 evidence of altered CZ activity in Parkinsonism (Galvan et al., 2015; Wichmann, 2019). This  
875 CZ hyperactivity might reflect augmented output from (presumably glutamatergic) neurons in  
876 cerebellar nuclei after dopamine depletion (Menardy et al., 2019). Our recordings in BZ do not  
877 uphold canonical firing rate-based models of basal ganglia–thalamocortical dysfunction in

878 Parkinsonism, but the predicted alterations might still emerge during specific motor behaviors.  
879 Nevertheless, our data support and extend the concept that profoundly dysrhythmic activity  
880 can arise without firing rate changes in the Parkinsonian BZ and SNr.

881

## 882 **Dysrhythmia in the Parkinsonian motor thalamus during slow-wave activity**

883 Previous studies of BG neurons show that dopamine depletion can alter the patterning  
884 of their discharges during, and with respect to, the stereotyped cortical slow oscillation, thereby  
885 providing valuable insights into the potential contributions of different sets of inputs to their  
886 activity (Magill et al., 2001; Belluscio et al., 2003; Tseng et al., 2005; Mallet et al., 2006; Walters  
887 et al., 2007; Zold et al., 2007, 2012; Abdi et al., 2015; Sharott et al., 2017). An extreme example  
888 of altered activity patterning occurs in the external globus pallidus; the firing of prototypic  
889 neurons in dopamine-intact animals tends to increase slightly around the peaks of cortical slow  
890 oscillations, whereas prototypic neuron firing in 6-OHDA-lesioned animals is strongly timed  
891 with slow oscillation troughs (Mallet et al., 2008a, 2012; Abdi et al., 2015). This aberrant 'anti-  
892 phase' oscillatory firing of prototypic neurons in Parkinsonism is likely the result of receiving  
893 hypersynchronous rhythmic GABAergic inputs from striatal neurons (Zold et al., 2012; Nevado-  
894 Holgado et al., 2014; Sharott et al., 2017; Kovalski et al., 2020). It follows that  
895 hypersynchronous rhythmic GABAergic outputs from BG should aberrantly entrain thalamic  
896 neurons, such that their preferred phase of firing is disturbed (Tseng, 2009). One previous  
897 study has addressed this prediction, revealing that neurons in the thalamic parafascicular  
898 nucleus, also targeted by GABAergic BG outputs, do not exhibit the expected anti-phase firing  
899 (Parr-Brownlie et al., 2009). In stark contrast, we demonstrate here that this prediction holds  
900 true for BZ neurons, with dopamine depletion resulting in weaker phase-locking and a  $\sim 100^\circ$   
901 shift in the mean angles of their firing with respect to cortical slow oscillations. Notably, the  
902 phase-locked firing of CZ neurons was not inappropriately timed to slow oscillations,  
903 reinforcing that SWA-related dysrhythmia in the Parkinsonian motor thalamus is selective for  
904 input zone. In line with other studies (Belluscio et al., 2003; Tseng et al., 2005; Walters et al.,  
905 2007; Lobb and Jaeger, 2015), the temporal coupling of SNr neuron firing to cortical slow

906 oscillations was markedly stronger in lesioned rats, such that some SNr neurons fired in a  
907 phasic bursting manner. We determined that SNr burst onsets timed with cyclical reductions  
908 in BZ neuron firing, whereas SNr burst offsets timed with the primary peak of BZ neuron  
909 activity. As such, the aberrant phase-locked burst firing of SNr neurons appears well suited to  
910 mediate the phase shift and dysrhythmia of BZ neurons after dopamine depletion; in future  
911 studies, it would be important to progress from correlation to causation. Ascribing this role to  
912 SNr does not preclude the possibility that other inputs to BZ, such as those from cortex, play  
913 important roles in driving the dysrhythmic activity of BZ neurons. In turn, the dysrhythmic firing  
914 of BZ neurons would be broadcast to wide areas of frontal cortex (Herkenham, 1979; Kuramoto  
915 et al., 2009, 2015), wherein it might negatively impact on activity dynamics. Numerous studies  
916 in people with PD have demonstrated alterations in cortical SWA and slow-wave sleep, with  
917 further implications for symptoms and quality of life (Zahed et al., 2021).

918

### 919 **Dysrhythmia in the Parkinsonian motor thalamus during cortical activation**

920 We observed that individual BZ neurons inappropriately engage with the exaggerated cortical  
921 beta oscillations that arise during activated brain states after dopamine depletion. This agrees  
922 with a study of the VM nucleus in awake 6-OHDA-lesioned rats (Brazhnik et al., 2016). It should  
923 be noted, however, that VM is difficult to objectively delineate with Nissl staining (as used in  
924 Brazhnik et al., 2016), and that VM is only a fraction of the BZ (Nakamura et al., 2014). Here,  
925 we provide important advances by accurately localizing recordings to the BZ and CZ (thus  
926 addressing selectivity for input zone), by defining the extent to which BZ neuronal ensembles  
927 are rhythmically synchronized, and by determining whether engagement in beta oscillations is  
928 accompanied by changes in BZ neuron firing rates. Our analyses of BUA signals show that,  
929 after dopamine depletion, focally-organized neuronal ensembles in the BZ inappropriately  
930 synchronize their outputs at beta frequencies. It was not possible to determine whether there  
931 was a phase shift in BZ neuron firing during cortical activation, as occurred during SWA,  
932 because so few neurons coupled their firing to the weak/transient cortical beta oscillations  
933 present in the dopamine-intact state. These experiments reveal a second manifestation of

934 dysrhythmia in the Parkinsonian motor thalamus, and we reiterate that exaggerated beta  
935 oscillations arise in BZ without firing rate changes. Expression of pathological beta-frequency  
936 activities is exquisitely selective for input zone, such that CZ neurons are not similarly  
937 dysrhythmic. Studies of idiopathic PD support the notion that exaggerated beta-band  
938 synchronization of BG neuronal activity underpins bradykinesia/rigidity (Kühn et al., 2006,  
939 2009; Ray et al., 2008; Sharott et al., 2014, 2018). We conclude that BZ neurons are primed  
940 to mediate the detrimental influences of abnormal beta-band activity on neuronal information  
941 processing and movement in PD.

942         We observed that the temporal coupling of cortical beta oscillations to the firing of  
943 individual SNr neurons was markedly stronger after dopamine depletion, as in awake rats  
944 (Brazhnik et al., 2012, 2014). Extending our analysis to BUA signals, we detail the novel  
945 observation that focal neuronal ensembles in the SNr inappropriately synchronize their outputs  
946 at beta frequencies. Importantly, there was an approximate anti-phase relationship between  
947 SNr and BZ ensemble activities at beta frequencies; on average, peaks in SNr ensemble  
948 activity preceded peaks in BZ ensemble activity by  $\sim 217^\circ$ . Given a range of beta oscillation  
949 periods of  $\sim 33$ – $66$  ms, this phase difference would represent a time delay of  $\sim 20$ – $40$  ms, which  
950 tallies with the time course of evoked nigrothalamic IPSPs and the subsequent pauses they  
951 cause in BZ neuron firing *ex vivo* (Edgerton and Jaeger, 2014). Together, our data suggest  
952 that aberrant inhibitory outputs arising from the hypersynchronized beta-band firing of SNr  
953 neurons is a valid candidate for orchestrating the related dysrhythmia of BZ neurons in  
954 Parkinsonism. Again, in future studies, it would be important to address causation.

955         Frontal cortical areas innervating motor thalamus exhibit exaggerated beta oscillations  
956 after dopamine depletion, as evidenced in our ECoG recordings here as well as those in awake  
957 rats (Sharott et al., 2005; Mallet et al., 2008b; Li et al., 2012; Brazhnik et al., 2016). It is thus  
958 possible that cortex also directly entrains BZ neurons to beta rhythms. However, it is unknown  
959 whether cortical neurons innervating BZ (and/or CZ) engage in abnormal beta oscillations. In  
960 terms of reciprocal influence, our GABA microinfusion experiments strongly suggest that  
961 ongoing activity in the BZ in particular bolsters exaggerated beta oscillations in motor cortex.



962 This would fit well with BZ neurons being positioned, via extensive axon collateral networks  
963 (Kuramoto et al., 2009, 2015), to deliver beta-band inputs to many cortical neurons. We  
964 conclude that the dysrhythmic BZ is a critical node in the wider basal ganglia-thalamocortical  
965 loop circuit for the generation and/or maintenance of pathological cortical beta oscillations in  
966 PD.  
967

## 968 **Acknowledgements**

969 This work was supported by the Medical Research Council (MRC; Awards MC\_UU\_12020/5,  
970 MC\_UU\_12024/2, and MC\_UU\_00003/5 to P.J.M; Awards MC\_UU\_12024/1 and  
971 MC\_UU\_00003/6 to A.S.), Parkinson's UK (Grant G-0806 to P.J.M.), and the Japan Society  
972 for the Promotion of Science Grants-in-Aid for Scientific Research (KAKENHI) (15H01663,  
973 26430015). K.C.N. was supported in part by the Human Frontier Science Program  
974 (LT000396/2009-L). A.S. was supported in part by a Marie Curie European Re-integration  
975 Grant (SNAP-PD) awarded by the European Union. We thank: T. Kaneko for gifts of antibodies,  
976 and I. Bar-Gad for MATLAB code; N. Mallet for assistance in early stages of this work; R.W.  
977 Guillery, E. Kuramoto, F. Vinciati and H. Cagnan for insightful scientific discussions; and L.  
978 Conyers, J. Westcott, and B. Micklem for technical support.

## 979 Reference

- 980 Abdi A, Mallet N, Mohamed FY, Sharott A, Dodson PD, Nakamura KC, Suri S, Avery SV, Larvin  
981 JT, Garas FN, Garas SN, Vinciati F, Morin S, Bezard E, Baufreton J, Magill PJ (2015)  
982 Prototypic and arky pallidal neurons in the dopamine-intact external globus pallidus. *J*  
983 *Neurosci* 35:6667–6688.
- 984 Anderson CJ, Sheppard DT, Huynh R, Anderson DN, Polar CA, Dorval AD (2015) Subthalamic  
985 deep brain stimulation reduces pathological information transmission to the thalamus  
986 in a rat model of parkinsonism. *Front Neural Circuits* 9:31.
- 987 Anderson ME, Turner RS (1991) Activity of neurons in cerebellar-receiving and pallidal-  
988 receiving areas of the thalamus of the behaving monkey. *J Neurophysiol* 66:879–893.
- 989 Avila I, Parr-Brownlie LC, Brazhnik E, Castañeda E, Bergstrom DA, Walters JR (2010) Beta  
990 frequency synchronization in basal ganglia output during rest and walk in a  
991 hemiparkinsonian rat. *Exp Neurol* 221:307–319.
- 992 Basha D, Dostrovsky JO, Lopez Rios AL, Hodaie M, Lozano AM, Hutchison WD (2014) Beta  
993 oscillatory neurons in the motor thalamus of movement disorder and pain patients. *Exp*  
994 *Neurol* 261:782–790.
- 995 Belluscio MA, Kasanetz F, Riquelme LA, Murer MG (2003) Spreading of slow cortical rhythms  
996 to the basal ganglia output nuclei in rats with nigrostriatal lesions. *Eur J Neurosci*  
997 17:1046–1052.
- 998 Berens P (2009) CircStat: A MATLAB toolbox for circular statistics. *J Stat Softw* 31:1–21.
- 999 Bichler EK, Cavarretta F, Jaeger D (2021) Changes in excitability properties of ventromedial  
1000 motor thalamic neurons in 6-OHDA lesioned mice. *eNeuro* 8:ENEURO.0436-20.2021.
- 1001 Bosch-Bouju C, Hyland BI, Parr-Brownlie LC (2013) Motor thalamus integration of cortical,  
1002 cerebellar and basal ganglia information: implications for normal and parkinsonian  
1003 conditions. *Front Comput Neurosci* 7:163.

- 1004 Bosch-Bouju C, Smither RA, Hyland BI, Parr-Brownlie LC (2014) Reduced reach-related  
1005 modulation of motor thalamus neural activity in a rat model of Parkinson's disease. *J*  
1006 *Neurosci* 34:15836–15850.
- 1007 Brazhnik E, Cruz AV, Avila I, Wahba MI, Novikov N, Ilieva NM, McCoy AJ, Gerber C, Walters  
1008 JR (2012) State-dependent spike and local field synchronization between motor cortex  
1009 and substantia nigra in hemiparkinsonian rats. *J Neurosci* 32:7869–7880.
- 1010 Brazhnik E, McCoy AJ, Novikov N, Hatch CE, Walters JR (2016) Ventral medial thalamic  
1011 nucleus promotes synchronization of increased high beta oscillatory activity in the basal  
1012 ganglia-thalamocortical network of the hemiparkinsonian rat. *J Neurosci* 36:4196–  
1013 4208.
- 1014 Brazhnik E, Novikov N, McCoy AJ, Cruz AV, Walters JR (2014) Functional correlates of  
1015 exaggerated oscillatory activity in basal ganglia output in hemiparkinsonian rats. *Exp*  
1016 *Neurol* 261:563–577.
- 1017 Chauvette S, Volgushev M, Timofeev I (2010) Origin of active states in local neocortical  
1018 networks during slow sleep oscillation. *Cereb Cortex* 20:2660–2674.
- 1019 DeLong MR (1990) Primate models of movement disorders of basal ganglia origin. *Trends*  
1020 *Neurosci* 13:281–285.
- 1021 Devergnas A, Chen E, Ma Y, Hamada I, Pittard D, Kammermeier S, Mullin AP, Faundez V,  
1022 Lindsley CW, Jones C, Smith Y, Wichmann T (2016) Anatomical localization of Cav3.1  
1023 calcium channels and electrophysiological effects of T-type calcium channel blockade  
1024 in the motor thalamus of MPTP-treated monkeys. *J Neurophysiol* 115:470–485.
- 1025 Edgerton JR, Jaeger D (2014) Optogenetic activation of nigral inhibitory inputs to motor  
1026 thalamus in the mouse reveals classic inhibition with little potential for rebound  
1027 activation. *Front Cell Neurosci* 8:36.
- 1028 Fanselow EE, Sameshima K, Baccala LA, Nicolelis MA (2001) Thalamic bursting in rats during  
1029 different awake behavioral states. *Proc Natl Acad Sci U S A* 98:15330–15335.
- 1030 Fisher NI (1995) *Statistical Analysis of Circular Data*, New edition. Cambridge: Cambridge  
1031 University Press.

- 1032 Galvan A, Devergnas A, Wichmann T (2015) Alterations in neuronal activity in basal ganglia-  
1033 thalamocortical circuits in the parkinsonian state. *Front Neuroanat* 9:5.
- 1034 Garas FN, Shah RS, Kormann E, Doig NM, Vinciati F, Nakamura KC, Dorst MC, Smith Y,  
1035 Magill PJ, Sharott A (2016) Secretagogin expression delineates functionally-  
1036 specialized populations of striatal parvalbumin-containing interneurons. *Elife* 5:e16088.
- 1037 Guehl D, Pessiglione M, François C, Yelnik J, Hirsch EC, Féger J, Tremblay L (2003) Tremor-  
1038 related activity of neurons in the “motor” thalamus: changes in firing rate and pattern in  
1039 the MPTP vervet model of parkinsonism. *Eur J Neurosci* 17:2388–2400.
- 1040 Hammond C, Bergman H, Brown P (2007) Pathological synchronization in Parkinson’s  
1041 disease: networks, models and treatments. *Trends Neurosci* 30:357–364.
- 1042 Herkenham M (1979) The afferent and efferent connections of the ventromedial thalamic  
1043 nucleus in the rat. *J Comp Neurol* 183:487–517.
- 1044 Hioki H, Fujiyama F, Taki K, Tomioka R, Furuta T, Tamamaki N, Kaneko T (2003) Differential  
1045 distribution of vesicular glutamate transporters in the rat cerebellar cortex.  
1046 *Neuroscience* 117:1–6.
- 1047 Holt GR, Softky WR, Koch C, Douglas RJ (1996) Comparison of discharge variability in vitro  
1048 and in vivo in cat visual cortex neurons. *J Neurophysiol* 75:1806–1814.
- 1049 Journée HL (1983) Demodulation of amplitude modulated noise: a mathematical evaluation of  
1050 a demodulator for pathological tremor EMG’s. *IEEE Trans Biomed Eng* 30:304–308.
- 1051 Kammermeier S, Pittard D, Hamada I, Wichmann T (2016) Effects of high-frequency  
1052 stimulation of the internal pallidal segment on neuronal activity in the thalamus in  
1053 parkinsonian monkeys. *J Neurophysiol* 116:2869–2881.
- 1054 Kojima S, Doupe AJ (2009) Activity propagation in an avian basal ganglia-thalamocortical  
1055 circuit essential for vocal learning. *J Neurosci* 29:4782–4793.
- 1056 Kovaleski RF, Callahan JW, Chazalon M, Wokosin DL, Baufreton J, Bevan MD (2020)  
1057 Dysregulation of external globus pallidus-subthalamic nucleus network dynamics in  
1058 parkinsonian mice during cortical slow-wave activity and activation. *J Physiol*  
1059 598:1897–1927.

- 1060 Kühn AA, Doyle L, Pogosyan A, Yarrow K, Kupsch A, Schneider G-H, Hariz MI, Trottenberg  
1061 T, Brown P (2006) Modulation of beta oscillations in the subthalamic area during motor  
1062 imagery in Parkinson's disease. *Brain* 129:695–706.
- 1063 Kühn AA, Tsui A, Aziz T, Ray N, Brücke C, Kupsch A, Schneider G-H, Brown P (2009)  
1064 Pathological synchronisation in the subthalamic nucleus of patients with Parkinson's  
1065 disease relates to both bradykinesia and rigidity. *Exp Neurol* 215:380–387.
- 1066 Kuramoto E, Fujiyama F, Nakamura KC, Tanaka Y, Hioki H, Kaneko T (2011) Complementary  
1067 distribution of glutamatergic cerebellar and GABAergic basal ganglia afferents to the  
1068 rat motor thalamic nuclei. *Eur J Neurosci* 33:95–109.
- 1069 Kuramoto E, Furuta T, Nakamura KC, Unzai T, Hioki H, Kaneko T (2009) Two types of  
1070 thalamocortical projections from the motor thalamic nuclei of the rat: a single neuron-  
1071 tracing study using viral vectors. *Cereb Cortex* 19:2065–2077.
- 1072 Kuramoto E, Ohno S, Furuta T, Unzai T, Tanaka YR, Hioki H, Kaneko T (2015) Ventral medial  
1073 nucleus neurons send thalamocortical afferents more widely and more preferentially to  
1074 layer 1 than neurons of the ventral anterior-ventral lateral nuclear complex in the rat.  
1075 *Cereb Cortex* 25:221–235.
- 1076 Lacey CJ, Bolam JP, Magill PJ (2007) Novel and distinct operational principles of intralaminar  
1077 thalamic neurons and their striatal projections. *J Neurosci* 27:4374–4384.
- 1078 Lachaux JP, Rodriguez E, Martinerie J, Varela FJ (1999) Measuring phase synchrony in brain  
1079 signals. *Hum Brain Mapp* 8:194–208.
- 1080 Li Q, Ke Y, Chan DCW, Qian Z-M, Yung KKL, Ko H, Arbutnott GW, Yung W-H (2012)  
1081 Therapeutic deep brain stimulation in Parkinsonian rats directly influences motor  
1082 cortex. *Neuron* 76:1030–1041.
- 1083 Lobb CJ, Jaeger D (2015) Bursting activity of substantia nigra pars reticulata neurons in mouse  
1084 parkinsonism in awake and anesthetized states. *Neurobiol Dis* 75:177–185.
- 1085 Lu SM, Guido W, Sherman SM (1992) Effects of membrane voltage on receptive field  
1086 properties of lateral geniculate neurons in the cat: contributions of the low-threshold  
1087 Ca<sup>2+</sup> conductance. *J Neurophysiol* 68:2185–2198.

- 1088 Magill PJ, Bolam JP, Bevan MD (2001) Dopamine regulates the impact of the cerebral cortex  
1089 on the subthalamic nucleus-globus pallidus network. *Neuroscience* 106:313–330.
- 1090 Magill PJ, Pogosyan A, Sharott A, Csicsvari J, Bolam JP, Brown P (2006) Changes in  
1091 functional connectivity within the rat striatopallidal axis during global brain activation *in*  
1092 *vivo*. *J Neurosci* 26:6318–6329.
- 1093 Mallet N, Ballion B, Le Moine C, Gonon F (2006) Cortical inputs and GABA interneurons  
1094 imbalance projection neurons in the striatum of parkinsonian rats. *J Neurosci* 26:3875–  
1095 3884.
- 1096 Mallet N, Micklem BR, Henny P, Brown MT, Williams C, Bolam JP, Nakamura KC, Magill PJ  
1097 (2012) Dichotomous organization of the external globus pallidus. *Neuron* 74:1075–  
1098 1086.
- 1099 Mallet N, Pogosyan A, Márton LF, Bolam JP, Brown P, Magill PJ (2008a) Parkinsonian beta  
1100 oscillations in the external globus pallidus and their relationship with subthalamic  
1101 nucleus activity. *J Neurosci* 28:14245–14258.
- 1102 Mallet N, Pogosyan A, Sharott A, Csicsvari J, Bolam JP, Brown P, Magill PJ (2008b) Disrupted  
1103 dopamine transmission and the emergence of exaggerated beta oscillations in  
1104 subthalamic nucleus and cerebral cortex. *J Neurosci* 28:4795–4806.
- 1105 Menardy F, Varani AP, Combes A, Léna C, Popa D (2019) Functional alteration of cerebello-  
1106 cerebral coupling in an experimental mouse model of Parkinson’s disease. *Cereb*  
1107 *Cortex* 29:1752–1766.
- 1108 Moran A, Bar-Gad I (2010) Revealing neuronal functional organization through the relation  
1109 between multi-scale oscillatory extracellular signals. *J Neurosci Methods* 186:116–129.
- 1110 Moran A, Bergman H, Israel Z, Bar-Gad I (2008) Subthalamic nucleus functional organization  
1111 revealed by parkinsonian neuronal oscillations and synchrony. *Brain* 131:3395–3409.
- 1112 Myers LJ, Lowery M, O’Malley M, Vaughan CL, Heneghan C, St Clair Gibson A, Harley YXR,  
1113 Sreenivasan R (2003) Rectification and non-linear pre-processing of EMG signals for  
1114 cortico-muscular analysis. *J Neurosci Methods* 124:157–165.



- 1115 Nakamura K, Morrison SF (2007) Central efferent pathways mediating skin cooling-evoked  
1116 sympathetic thermogenesis in brown adipose tissue. *Am J Physiol Regul Integr Comp*  
1117 *Physiol* 292:R127-136.
- 1118 Nakamura KC, Sharott A, Magill PJ (2014) Temporal coupling with cortex distinguishes  
1119 spontaneous neuronal activities in identified basal ganglia-recipient and cerebellar-  
1120 recipient zones of the motor thalamus. *Cereb Cortex* 24:81–97.
- 1121 Nevado-Holgado AJ, Mallet N, Magill PJ, Bogacz R (2014) Effective connectivity of the  
1122 subthalamic nucleus-globus pallidus network during Parkinsonian oscillations. *J*  
1123 *Physiol* 592:1429–1455.
- 1124 Parr-Brownlie LC, Poloskey SL, Bergstrom DA, Walters JR (2009) Parafascicular thalamic  
1125 nucleus activity in a rat model of Parkinson’s disease. *Exp Neurol* 217:269–281.
- 1126 Paxinos G, Watson C (2007) *The rat brain in stereotaxic coordinates*, 6th ed. Amsterdam  
1127 (Netherland), Boston (MA): Academic Press.
- 1128 Pessiglione M, Guehl D, Rolland A-S, François C, Hirsch EC, Féger J, Tremblay L (2005)  
1129 Thalamic neuronal activity in dopamine-depleted primates: evidence for a loss of  
1130 functional segregation within basal ganglia circuits. *J Neurosci* 25:1523–1531.
- 1131 Ray NJ, Jenkinson N, Wang S, Holland P, Brittain JS, Joint C, Stein JF, Aziz T (2008) Local  
1132 field potential beta activity in the subthalamic nucleus of patients with Parkinson’s  
1133 disease is associated with improvements in bradykinesia after dopamine and deep  
1134 brain stimulation. *Exp Neurol* 213:108–113.
- 1135 Rubin JE, McIntyre CC, Turner RS, Wichmann T (2012) Basal ganglia activity patterns in  
1136 parkinsonism and computational modeling of their downstream effects. *Eur J Neurosci*  
1137 36:2213–2228.
- 1138 Sakata S, Harris KD (2009) Laminar structure of spontaneous and sensory-evoked population  
1139 activity in auditory cortex. *Neuron* 64:404–418.
- 1140 Schneider JS, Rothblat DS (1996) Alterations in intralaminar and motor thalamic physiology  
1141 following nigrostriatal dopamine depletion. *Brain Res* 742:25–33.

- 1142 Schwarting RK, Huston JP (1996) Unilateral 6-hydroxydopamine lesions of meso-striatal  
1143 dopamine neurons and their physiological sequelae. *Prog Neurobiol* 49:215–266.
- 1144 Sharott A, Doig NM, Mallet N, Magill PJ (2012) Relationships between the firing of identified  
1145 striatal interneurons and spontaneous and driven cortical activities in vivo. *J Neurosci*  
1146 32:13221–13236.
- 1147 Sharott A, Gulberti A, Hamel W, Köppen JA, Münchau A, Buhmann C, Pötter-Nerger M,  
1148 Westphal M, Gerloff C, Moll CKE, Engel AK (2018) Spatio-temporal dynamics of  
1149 cortical drive to human subthalamic nucleus neurons in Parkinson’s disease. *Neurobiol*  
1150 *Dis* 112:49–62.
- 1151 Sharott A, Gulberti A, Zittel S, Tudor Jones AA, Fickel U, Münchau A, Köppen JA, Gerloff C,  
1152 Westphal M, Buhmann C, Hamel W, Engel AK, Moll CKE (2014) Activity parameters of  
1153 subthalamic nucleus neurons selectively predict motor symptom severity in Parkinson’s  
1154 disease. *J Neurosci* 34:6273–6285.
- 1155 Sharott A, Magill PJ, Harnack D, Kupsch A, Meissner W, Brown P (2005) Dopamine depletion  
1156 increases the power and coherence of beta-oscillations in the cerebral cortex and  
1157 subthalamic nucleus of the awake rat. *Eur J Neurosci* 21:1413–1422.
- 1158 Sharott A, Vinciati F, Nakamura KC, Magill PJ (2017) A population of indirect pathway striatal  
1159 projection neurons is selectively entrained to Parkinsonian beta oscillations. *J Neurosci*  
1160 37:9977–9998.
- 1161 Siapas AG, Lubenov EV, Wilson MA (2005) Prefrontal phase locking to hippocampal theta  
1162 oscillations. *Neuron* 46:141–151.
- 1163 Smith Y, Bevan MD, Shink E, Bolam JP (1998) Microcircuitry of the direct and indirect  
1164 pathways of the basal ganglia. *Neuroscience* 86:353–387.
- 1165 Steriade M (2000) Corticothalamic resonance, states of vigilance and mentation. *Neuroscience*  
1166 101:243–276.
- 1167 Szucs A (1998) Applications of the spike density function in analysis of neuronal firing patterns.  
1168 *J Neurosci Methods* 81:159–167.

- 1169 Tseng KY (2009) Facing the lack of anti-phase oscillation in the parafascicular nucleus after  
1170 dopamine depletion. *Exp Neurol* 219:62–65.
- 1171 Tseng KY, Kargieman L, Gacio S, Riquelme LA, Murer MG (2005) Consequences of partial  
1172 and severe dopaminergic lesion on basal ganglia oscillatory activity and akinesia. *Eur*  
1173 *J Neurosci* 22:2579–2586.
- 1174 Ushimaru M, Ueta Y, Kawaguchi Y (2012) Differentiated participation of thalamocortical  
1175 subnetworks in slow/spindle waves and desynchronization. *J Neurosci* 32:1730–1746.
- 1176 Vitek JL, Ashe J, DeLong MR, Alexander GE (1994) Physiologic properties and somatotopic  
1177 organization of the primate motor thalamus. *J Neurophysiol* 71:1498–1513.
- 1178 Walters JR, Hu D, Itoga CA, Parr-Brownlie LC, Bergstrom DA (2007) Phase relationships  
1179 support a role for coordinated activity in the indirect pathway in organizing slow  
1180 oscillations in basal ganglia output after loss of dopamine. *Neuroscience* 144:762–776.
- 1181 Wichmann T (2019) Changing views of the pathophysiology of Parkinsonism. *Mov Disord*  
1182 34:1130–1143.
- 1183 Willard AM, Isett BR, Whalen TC, Mastro KJ, Ki CS, Mao X, Gittis AH (2019) State transitions  
1184 in the substantia nigra reticulata predict the onset of motor deficits in models of  
1185 progressive dopamine depletion in mice. *Elife* 8:e42746.
- 1186 Wu T, Hallett M (2013) The cerebellum in Parkinson’s disease. *Brain* 136:696–709.
- 1187 Zahed H, Zuzuarregui JRP, Gilron R, Denison T, Starr PA, Little S (2021) The neurophysiology  
1188 of sleep in Parkinson’s disease. *Mov Disord* 36:1526–1542.
- 1189 Zold CL, Ballion B, Riquelme LA, Gonon F, Murer MG (2007) Nigrostriatal lesion induces D2-  
1190 modulated phase-locked activity in the basal ganglia of rats. *Eur J Neurosci* 25:2131–  
1191 2144.
- 1192 Zold CL, Escande MV, Pomata PE, Riquelme LA, Murer MG (2012) Striatal NMDA receptors  
1193 gate cortico-pallidal synchronization in a rat model of Parkinson’s disease. *Neurobiol*  
1194 *Dis* 47:38–48.
- 1195
- 1196

## 1197 **Figure Legends**

1198

1199 **Figure 1. Brain state-dependent firing of identified neurons in the basal ganglia-**  
1200 **recipient zone and cerebellar-recipient zone of the motor thalamus in dopamine-intact**  
1201 **and 6-OHDA-lesioned rats. A, Left,** Spontaneous firing of a thalamic unit during cortical slow-  
1202 wave activity in a dopamine-intact rat. Brain state was defined according to simultaneous  
1203 electrocorticogram (ECoG) recordings; during SWA, the ECoG was dominated by slow (~1  
1204 Hz) oscillations, as further verified in the ECoG power spectrum (*upper right*). The thalamic  
1205 unit fired stereotypical low-threshold Ca<sup>2+</sup> spike bursts (indicated with asterisks) on most cycles  
1206 of the cortical slow oscillation. Such bursts were characterized by 2–6 action potentials fired in  
1207 rapid succession, often with a progressive attenuation of action potential amplitude during the  
1208 burst (a typical burst is highlighted by the dashed box and also shown at higher temporal  
1209 resolution in the *inset*). *Right,* Subsequent to electrophysiological recording with a glass  
1210 electrode, the same neuron was juxtacellularly filled with neurobiotin, fluorescently labeled,  
1211 and identified (white, arrowhead). The neuron was then localized to the basal ganglia-recipient  
1212 zone (BZ) of motor thalamus, which was demarcated by intense GAD67 immunoreactivity  
1213 (green) and sparse VGlut2 immunoreactivity (red) in the parasagittal tissue section (~1.6 mm  
1214 lateral of bregma [ML]). **B,** Spontaneous firing of an identified BZ neuron during SWA in a 6-  
1215 OHDA-lesioned rat. **C,** Spontaneous firing of an identified BZ neuron recorded during cortical  
1216 activation, as verified by a relative paucity of ECoG slow oscillations, in a dopamine-intact rat.  
1217 Note that the BZ neuron does not fire low-threshold spike bursts during cortical activation. **D,**  
1218 Spontaneous firing of an identified BZ neuron during cortical activation in a lesioned rat. Note  
1219 the distinct peak at beta frequencies (black arrow) in the ECoG power spectrum. **E,** Recording  
1220 made during cortical SWA in a dopamine-intact rat of a neuron that was subsequently localized  
1221 to the cerebellar-recipient zone (CZ) of motor thalamus, as delineated by sparse GAD67 and  
1222 moderate VGlut2 immunoreactivities. **F,** Spontaneous firing of an identified CZ neuron during  
1223 SWA in a lesioned rat. **G,** Spontaneous firing of an identified CZ neuron during cortical

1224 activation in a dopamine-intact rat. **H**, Spontaneous firing of an identified CZ neuron during  
1225 cortical activation in a lesioned rat. In all parasagittal sections, rostral is towards the left, and  
1226 dorsal is towards the top, with the borders of BZ and CZ indicated with dashed white lines. AM,  
1227 anteromedial thalamic nucleus; AV, anteroventral thalamic nucleus; MD, mediodorsal thalamic  
1228 nucleus; Po, posterior nuclear group; Rt, thalamic reticular nucleus; VPL, ventral posterolateral  
1229 thalamic nucleus; VPM, ventral posteromedial thalamic nucleus. Scale bars in fluorescence  
1230 images: 1 mm. Vertical calibration bars: 0.5 mV.

1231  
1232 **Figure 2. Quantitative comparisons of the firing rates and patterns of BZ and CZ neurons**  
1233 **during two brain states in dopamine-intact and 6-OHDA-lesioned rats.** Mean firing rates  
1234 (**A, B, G** and **H**), firing variability, as indexed by the coefficients of variation (CV2) of interspike  
1235 intervals (**C, D, I** and **J**), and mean percentage of all spikes occurring in low-threshold  $\text{Ca}^{2+}$   
1236 spike bursts (**E, F, K** and **L**) for all individual neurons recorded with glass electrodes in the BZ  
1237 (light/dark greens) and in the CZ (pink/purple) of the motor thalamus. **A–F**, Thalamic activity  
1238 parameters during SWA. Dopamine depletion was associated with an increase in the mean  
1239 firing rates of BZ neurons (only), but did not alter the firing variabilities of either BZ or CZ  
1240 neurons during SWA. **G–L**, Thalamic activity parameters during cortical activation. On  
1241 average, the firing rates of CZ neurons, but not BZ neurons, were increased in lesioned rats.  
1242 The activity patterns of motor thalamic neurons were intimately related to brain state; during  
1243 cortical activation, their firing rates were relatively high and they rarely fired LTS bursts. Box  
1244 plots in this and subsequent figures denote the non-outlier values closest to the first and third  
1245 quartiles (whiskers), interquartile range, and medians. Data from individual identified and  
1246 extrapolated neurons are shown as filled and open circles, respectively. \* $p < 0.05$  (exact  $p$   
1247 values are in Results text), Mann–Whitney U tests.

1248  
1249 **Figure 3. Spike timings of BZ and CZ neurons in relation to cortical slow oscillations.**  
1250 **A**, Mean power spectra of ECoGs simultaneously recorded with all BZ neurons and all CZ  
1251 neurons in dopamine-intact and 6-OHDA-lesioned rats. Power is relative to that at 0.4–100 Hz.

1252 Gray shading denotes frequency band of slow oscillations analyzed (0.4–1.6 Hz). **B**, Mean  
1253 power spectra of the spike discharges of all BZ neurons and CZ neurons. Note the peaks in  
1254 power at frequencies similar to those of the cortical slow oscillations (**A**). **C**, Mean coherence  
1255 spectra between ECoGs and all BZ neurons and CZ neurons (color coding and sample sizes  
1256 as in **B**). Bin size of spectra in **A–C** is 0.2 Hz. **D**, Linear phase histograms of the spike  
1257 discharges of all BZ neurons with respect to cortical slow oscillations (bin size = 20°). Note the  
1258 altered temporal coupling after dopamine depletion. For clarity, two cortical slow oscillation  
1259 cycles are shown. **E**, Heat map representation of linear phase histograms of individual BZ  
1260 neurons (bin size = 20°; neurons sorted by vector length, with longest at top). **F**, Circular plots  
1261 of phase-locked firing of BZ neurons in dopamine-intact and lesioned rats. In this and  
1262 subsequent circular plots of individual neurons, only those neurons that qualified for analyses  
1263 (i.e.  $\geq 40$  spikes recorded) and were significantly phase-locked ( $p < 0.05$ , Rayleigh's Uniformity  
1264 Test) are shown. Vectors of preferred firing of individual neurons are shown as lines radiating  
1265 from the center. Greater vector lengths indicate lower variance in the distribution around the  
1266 mean phase angle. Each circle on the plot perimeter represents the preferred phase (i.e. mean  
1267 phase of all the spikes) of an individual neuron. **G–I**, As in **D–F**, but for CZ neurons. **J**, Mean  
1268 vectors of the preferred firing phases of thalamic neurons in each group. Note that the angular  
1269 shift in the vector of BZ neurons in lesioned rats. **K**, Vector lengths for all the spikes of all BZ  
1270 and CZ neurons in dopamine-intact and lesioned rats. Data from individual identified and  
1271 extrapolated neurons are shown as filled and open circles, respectively. \* $p < 0.05$  (exact  $p$   
1272 values are in Results text), Dunn's tests following Kruskal–Wallis ANOVA. Data in **A–D** and **G**  
1273 are mean  $\pm$  SEM.  $n$ , the number of neurons/ECoGs analyzed. All individual neurons recorded  
1274 with glass electrodes.

1275

1276 **Figure 4. Spike timings of SNr neurons in relation to cortical slow oscillations.** **A**, Mean  
1277 power spectra of ECoGs simultaneously recorded with SNr neurons in dopamine-intact and 6-  
1278 OHDA-lesioned rats. Gray shading denotes frequency band of slow oscillations analyzed (0.4–  
1279 1.6 Hz). **B**, Mean power spectra of the spike discharges of all SNr neurons. Note the peaks in

1280 power at frequencies similar to those of the cortical slow oscillations (**A**). **C**, Mean coherence  
1281 spectra between ECoGs and all SNr neurons (color coding and sample sizes as in **B**). Bin size  
1282 of spectra in **A–C** is 0.2 Hz. **D**, Example spike trains of single SNr neurons, shown together  
1283 with simultaneously-recorded ECoGs for context, in an intact rat and a lesioned rat. **E**, Linear  
1284 phase histograms of the spike discharges of all SNr neurons with respect to cortical slow  
1285 oscillations (bin size = 20°). Note the increased temporal coupling after dopamine depletion.  
1286 **F**, Heat map representation of linear phase histograms of individual SNr neurons (bin size =  
1287 20°; neurons sorted by vector length, with longest at top). **G**, Detection of bursts of spikes fired  
1288 by SNr neurons in lesioned rats. The spike train of a single SNr neuron (middle) and its spike  
1289 density function (SDF, bottom) are shown together with the simultaneously-recorded ECoG  
1290 (top). The yellow dashed line in the SDF plot indicates the threshold (see Materials and  
1291 Methods) for detecting the onsets and offsets of bursts. Yellow and blue ticks in the spike train  
1292 indicate spikes fired within and outside of bursts, respectively. **H**, Linear phase histograms of  
1293 the onsets (solid line in yellow) and offsets (dashed line in brown) of bursts fired by SNr  
1294 neurons ( $n = 14$ ; bin size = 20°) in lesioned rats, in comparison with the firing of BZ neurons in  
1295 lesioned rats (dot and dashed line in gray). **I**, Heat map representation of linear phase  
1296 histograms of burst onsets and burst offsets of the 14 SNr neurons (bin size = 20°; neurons  
1297 sorted by vector length). **J**, Circular plots of phase-locked firing of individual SNr neurons in  
1298 dopamine-intact and lesioned rats. **K**, Mean vectors of the preferred phases of SNr neurons in  
1299 each group. **L**, Vector lengths for all the spikes of all SNr neurons in dopamine-intact and  
1300 lesioned rats.  $*p = 5.06 \times 10^{-5}$ , Mann–Whitney U test. Data in **A–C**, **E** and **H** are mean  $\pm$  SEM.  
1301  $n$ , the number of neurons/ECoGs analyzed. All neurons are single units recorded with silicon  
1302 probes.

1303

1304 **Figure 5. Spike timings of BZ and CZ neurons in relation to cortical beta oscillations. A**,  
1305 Mean power spectra of ECoGs simultaneously recorded with all BZ neurons and all CZ  
1306 neurons in dopamine-intact and 6-OHDA-lesioned rats. Power is relative to that at 1–100 Hz.  
1307 Gray shading denotes frequency band of beta oscillations analyzed (15–30 Hz). **B**, Mean



1308 power spectra of the spike discharges of BZ neurons and CZ neurons. Note the peak in power  
1309 at beta frequencies for BZ neurons in lesioned rats; their peak frequency was similar to that of  
1310 cortical beta oscillations (**A**). **C**, Mean coherence spectra between ECoGs and all BZ neurons  
1311 and CZ neurons (color coding and sample sizes as in **B**). Note the peak in coherence at beta  
1312 frequencies for BZ neurons in lesioned rats. Bin size of spectra in **A–C** is 1 Hz. **D**, Linear phase  
1313 histograms of the spike discharges of all BZ neurons with respect to cortical beta oscillations  
1314 (bin size = 20°). Note the increased temporal coupling after dopamine depletion. For clarity,  
1315 two cortical beta oscillation cycles are shown. **E**, Heat map representation of linear phase  
1316 histograms of individual BZ neurons (bin size = 20°; neurons sorted by vector length, with  
1317 longest at top). **F, G**, As in **D, E**, but for CZ neurons. **H, Left**, Circular plot of the phase-locked  
1318 firing of individual BZ neurons in lesioned rats. **Right**, Mean vector of the preferred phases of  
1319 BZ neurons in lesioned rats. **I**, Vector lengths for all the spikes of all BZ and CZ neurons in  
1320 dopamine-intact and lesioned rats. Data from individual identified and extrapolated neurons  
1321 are shown as filled and open circles, respectively. \* $p < 0.05$  (exact  $p$  values are in Results text),  
1322 Dunn's tests following Kruskal–Wallis ANOVA. Data in **A–D**, and **F** are mean  $\pm$  SEM.  $n$ , the  
1323 number of neurons/ECoGs analyzed. All individual neurons recorded with glass electrodes.

1324  
1325 **Figure 6. Example localization of background-unit activity signals in the motor**  
1326 **thalamus, and their relationship with cortical beta oscillations.** **A**, Image of a parasagittal  
1327 tissue section from a 6-OHDA-lesioned rat, with Dil fluorescence signal (in an inverted tone for  
1328 clarity) marking four penetration tracks made at different times by a Dil-coated silicon probe  
1329 during recordings *in vivo*. An overlaid image with enhanced contrast reveals the ends of three  
1330 tracks. The estimated positions of the probe's 16 recording contacts along one such track are  
1331 denoted by short lines. **A'**, The Dil signal (red) was localized with respect to the basal ganglia-  
1332 recipient zone (BZ) and cerebellar-recipient zone (CZ) of the motor thalamus, as delineated by  
1333 GAD67 (green) and GlyT2 (blue) immunofluorescence, on the same section as in **A**. Probe  
1334 contacts 1–9 were considered to have been within BZ, whereas contacts 11–16 were in CZ.  
1335 **B**, Background-unit activity (BUA) signals from the 16 recording contacts at the positions

1336 indicated in **A/A'**, averaged according to the instantaneous phases of cortical beta oscillations  
1337 (bin size = 20°) and plotted as a heat map. Note the large-amplitude phasic modulation of BUA  
1338 signals at contacts 5–9 within the BZ. **C**, Power spectra of BUA signals, from the same  
1339 recordings as in **B**, shown as a heat map. Power is relative to that at 1–100 Hz. **D**, Spectra of  
1340 coherence between the same BUA signals and the simultaneously-recorded ECoG. Note the  
1341 focal nature of thalamic power and coherence at beta frequencies. Bin size of spectra in **C** and  
1342 **D** is 1 Hz. In the parasagittal section shown in **A/A'**, rostral is towards the left, and dorsal is  
1343 towards the top. AD, anterodorsal thalamic nucleus; CL, central lateral thalamic nucleus; PC,  
1344 paracentral thalamic nucleus; Rt, thalamic reticular nucleus; ZI, zona incerta. For abbreviations  
1345 of other thalamic nuclei, see Fig1.

1346  
1347 **Figure 6-1 (Extended data). Steps for extraction and processing of background-unit**  
1348 **activity (BUA) signals for time series analyses.** Wideband recordings made with silicon  
1349 probes were high-pass filtered at 300 Hz, and then any large-amplitude action potentials  
1350 (spikes) were detected (**A–C**). Pink spikes in **A** are those identified as being of large amplitude  
1351 (crossing the threshold of 3 standard deviations indicated by the dashed line), with asterisks  
1352 in **A** and **B** indicating the same large spike. These large spikes were then removed and  
1353 replaced with another randomly-selected part of the recording that did not contain large spikes  
1354 (**D–F**). Replacement data are also highlighted in pink in **D–L**. The resultant BUA signals were  
1355 then rectified and mean subtracted (**G–I**) before being low-pass filtered at 300 Hz and  
1356 downsampled to 1024 Hz to generate a continuous measure for further analyses (**J–L**).  
1357 Portions of individual signals at each processing step are shown at low (**A, D, G, J**) and high  
1358 (**B, E, H, K**) temporal resolutions. Several traces are overlaid in relation to the detected large-  
1359 amplitude spikes to clarify the effects of removing spikes and other signal processing steps (**C,**  
1360 **F, I, L**). **M–O**, Examples of autocorrelation functions of processed BUA signals recorded in the  
1361 BZ (**M**) and CZ (**N**) of the motor thalamus and in the SNr (**O**) of 6-OHDA-lesioned rats. Note in  
1362 the BZ and SNr autocorrelations the presence of multiple peaks every 40–50 ms, reflecting  
1363 oscillations in the beta-frequency band (15–30 Hz).

1364

1365 **Figure 7. Background-unit activity signals in the motor thalamus during cortical**

1366 **activation in dopamine-intact and 6-OHDA-lesioned rats. A,** Mean power spectra of

1367 ECoGs simultaneously recorded with background-unit activity (BUA) in BZ and CZ in

1368 dopamine-intact and 6-OHDA-lesioned rats. Gray shading denotes frequency band of beta

1369 oscillations analyzed (15–30 Hz). **B,** Mean power spectra of BUA signals recorded in motor

1370 thalamus. Note the peak in power at beta frequencies for the BZ BUA signals in lesioned rats.

1371 **C,** Mean coherence spectra between the thalamic BUA signals and ECoGs (color coding and

1372 sample sizes as in **B**). Note the peak in coherence at beta frequencies for BZ BUA signals in

1373 lesioned rats. **D,** Coherence spectra of simultaneously-recorded pairs of BZ BUA signals. **E,**

1374 As in **D**, but for pairs of CZ BUA signals. **F,** Coherence spectra between simultaneously-

1375 recorded pairs of BZ and CZ BUA signals. **G,** Heat map representation of the phase-averaged

1376 waveforms of the significantly-modulated BZ BUA signals ( $n = 35$ ) in lesioned rats (bin size =

1377  $5^\circ$ ; BUA signals sorted by vector length). **H,** Group average of waveforms shown in **G**. Note

1378 that positive modulations of BZ BUA tended to occur during the descending phase of cortical

1379 beta oscillations. **I, Left,** Circular plots of the individual significantly-modulated BZ BUA signals

1380 in lesioned rats. Vectors representing the phase preference of individual BUA signals are

1381 shown as lines radiating from the center. Greater vector lengths indicate greater modulation of

1382 BUA amplitude around the mean phase angle. Each circle on the plot perimeter represents the

1383 preferred phase of an individual BUA signal. **Right,** Mean vector of the preferred phases of all

1384 significantly-modulated BZ BUA signals. **J,** Mean power spectrum of the significantly-

1385 modulated BZ BUA signals. **K,** Mean coherence spectrum between significantly-modulated BZ

1386 BUA signals and the simultaneously-recorded ECoGs. Data in **A–F**, **H**, **J** and **K** are mean  $\pm$

1387 SEM. Bin size of power and coherence spectra is 1 Hz.  $n$ , the number of individual ECoG

1388 recordings (**A**), the number of individual BUA signals recorded (**B**, **C**), the number of pairs of

1389 BUA signals recorded (**D–F**), the number of the significantly-modulated BZ BUA signals (**G–**

1390 **K**). All BUA recorded with silicon probes.

1391

1392 **Figure 8. Example localization of background-unit activity signals in the SNr, and their**  
1393 **relationship with cortical beta oscillations. *A***, Image of a parasagittal tissue section from a  
1394 6-OHDA-lesioned rat, with Dil fluorescence signal (in an inverted tone for clarity) marking three  
1395 penetration tracks made at different times by a Dil-coated silicon probe during recordings *in*  
1396 *vivo*. The estimated positions of the probe's 16 recording contacts along one such track are  
1397 denoted by short lines. ***A'***, The Dil signal (red) was localized with respect to the SNr, as  
1398 delineated by GAD67 immunofluorescence (green), on the same section as in ***A***. Probe  
1399 contacts 2–10 were considered to have been within SNr. ***B***, Background-unit activity (BUA)  
1400 signals from the 16 recording contacts at the positions indicated in ***A/A'***, averaged according  
1401 to the instantaneous phases of cortical beta oscillations (bin size = 20°) and plotted as a heat  
1402 map. Note the large-amplitude phasic modulation of BUA signals at contacts 2–6 within the  
1403 SNr. ***C***, Power spectra of BUA signals, from the same recordings as in ***B***, shown as a heat  
1404 map. Power is relative to that at 1–100 Hz. ***D***, Spectra of coherence between the same BUA  
1405 signals and the simultaneously-recorded ECoG. Note the focal nature of SNr power and  
1406 coherence at beta frequencies. Bin size of spectra in ***C*** and ***D*** is 1 Hz. In the parasagittal  
1407 section shown in ***A/A'***, rostral is towards the left, and dorsal is towards the top.

1408  
1409 **Figure 9. Background-unit activity signals in the SNr during cortical activation in**  
1410 **dopamine-intact and 6-OHDA-lesioned rats. *A***, Mean power spectra of ECoGs  
1411 simultaneously recorded with background-unit activity (BUA) in the SNr in dopamine-intact and  
1412 6-OHDA-lesioned rats. Gray shading denotes frequency band of beta oscillations analyzed  
1413 (15–30 Hz). ***B***, Mean power spectra of BUA signals recorded in SNr. Note the peak in power  
1414 at beta frequencies for the SNr BUA signals in lesioned rats. ***C***, Mean coherence spectra  
1415 between the SNr BUA signals and ECoGs (color coding and sample sizes as in ***B***). Note the  
1416 peak in coherence at beta frequencies for SNr BUA signals in lesioned rats. ***D***, Coherence  
1417 spectra of simultaneously-recorded pairs of SNr BUA signals. ***E***, Mean coherence spectra  
1418 between SNr single units and ECoGs. ***F***, Mean vector of the preferred phases of SNr single  
1419 units in lesioned rats. ***G***, Heat map representation of the phase-averaged waveforms of the

1420 significantly-modulated SNr BUA signals ( $n = 90$ ) in lesioned rats (bin size =  $5^\circ$ ; BUA signals  
1421 sorted by vector length). **H**, Group average of waveforms shown in **G**. Note that positive  
1422 modulations of SNr BUA tended to occur during the ascending phase of cortical beta  
1423 oscillations. **I**, *Left*, Circular plots of the individual significantly-modulated SNr BUA signals in  
1424 lesioned rats. *Right*, Mean vector of the preferred phases of all significantly-modulated SNr  
1425 BUA signals. **J**, Mean power spectrum of the significantly-modulated SNr BUA signals. **K**,  
1426 Mean coherence spectrum between significantly-modulated SNr BUA signals and the  
1427 simultaneously-recorded ECoGs. Data in **A–E**, **H**, **J** and **K** are mean  $\pm$  SEM. Bin size of power  
1428 and coherence spectra is 1 Hz.  $n$ , the number of individual ECoG recordings (**A**), the number  
1429 of individual BUA signals recorded (**B**, **C**), the number of pairs of BUA signals recorded (**D**),  
1430 the number of single units (**E**), the number of significantly phase-locked single units (**F**), the  
1431 number of the significantly-modulated SNr BUA signals (**G–K**). All BUA signals and single units  
1432 were recorded with silicon probes.

1433

1434 **Figure 10. Effects of microinfusions of GABA into motor thalamus on the expression of**  
1435 **cortical beta oscillations in 6-OHDA-lesioned rats.** **A**, Time-evolving power spectrogram of  
1436 oscillations recorded over the motor cortex in a lesioned rat before, during and after a single  
1437 infusion of a GABA solution (60 nl, 0.5 M) into the BZ of the motor thalamus. Note the clear  
1438 reduction in the power of the abnormal beta oscillations (centre frequency of  $\sim 24$  Hz) a few  
1439 seconds after the onset of the GABA infusion (at time = 0 s). **B**, Power of cortical oscillations  
1440 in the beta-frequency band (15–30 Hz; normalized to beta power in the 100 s immediately  
1441 preceding GABA infusion) before, during and after three separate infusions of GABA at the  
1442 same site in BZ (yellow, red and blue traces). The blue trace corresponds to the data shown  
1443 in (**A**). The interval between each infusion was  $>10$  min. The horizontal bars (yellow, red, blue)  
1444 indicate the corresponding duration of each manually-controlled GABA infusion. Note the  
1445 highly-reproducible time course and magnitude of the reduction in cortical beta power upon  
1446 GABA infusion. **C**, The GABA infusion site accessed in (**A**) and (**B**) was localized to the BZ of  
1447 motor thalamus by *post hoc* anatomical analyses; the fluorescent beads marking the trajectory

1448 of the infusion pipette traversed the border between CZ and BZ (dashed line), and then  
1449 terminated in the BZ (arrows). **D**, Mean power of cortical beta oscillations before, during and  
1450 after all infusions of GABA at BZ sites (green trace) or at CZ sites (purple trace) in the motor  
1451 thalamus. Green and purple shaded areas show SEMs. Horizontal bars indicate the mean  
1452 durations (+ SEMs) of the manually-controlled GABA infusions into BZ (green) or CZ (purple).  
1453 The nadirs in cortical beta power occurred around 100 s after the onset of GABA infusion. Note  
1454 that the cortical beta power at 50–150 s after BZ infusions was lower than that after CZ  
1455 infusions. **E**, Effect sizes of all GABA infusions at BZ sites (green circles) or CZ sites (purple  
1456 circles). Effect size was defined as the percentage reduction in cortical beta power at 50–150  
1457 s after GABA infusion (“Post” gray shading in **D**) as compared to power during the 100 s  
1458 immediately before infusion (“Pre” gray shading in **D**). Note that, on average, the effect sizes  
1459 of BZ infusions were larger than those of CZ infusions ( $*p = 0.0297$ , Mann–Whitney  $U$  test). **F**,  
1460 Effect size of each GABA infusion according to its location in BZ and CZ. In the parasagittal  
1461 sections shown in (**C**) and (**F**), rostral is towards the left, and dorsal is towards the top. APT,  
1462 anterior pretectal nucleus; LD, lateral dorsal nucleus, lateral posterior nucleus, ml, medial  
1463 lemniscus; PF, parafascicular nucleus. For abbreviations of other structures in and around the  
1464 thalamus, see Figs.1 and 6.  
1465



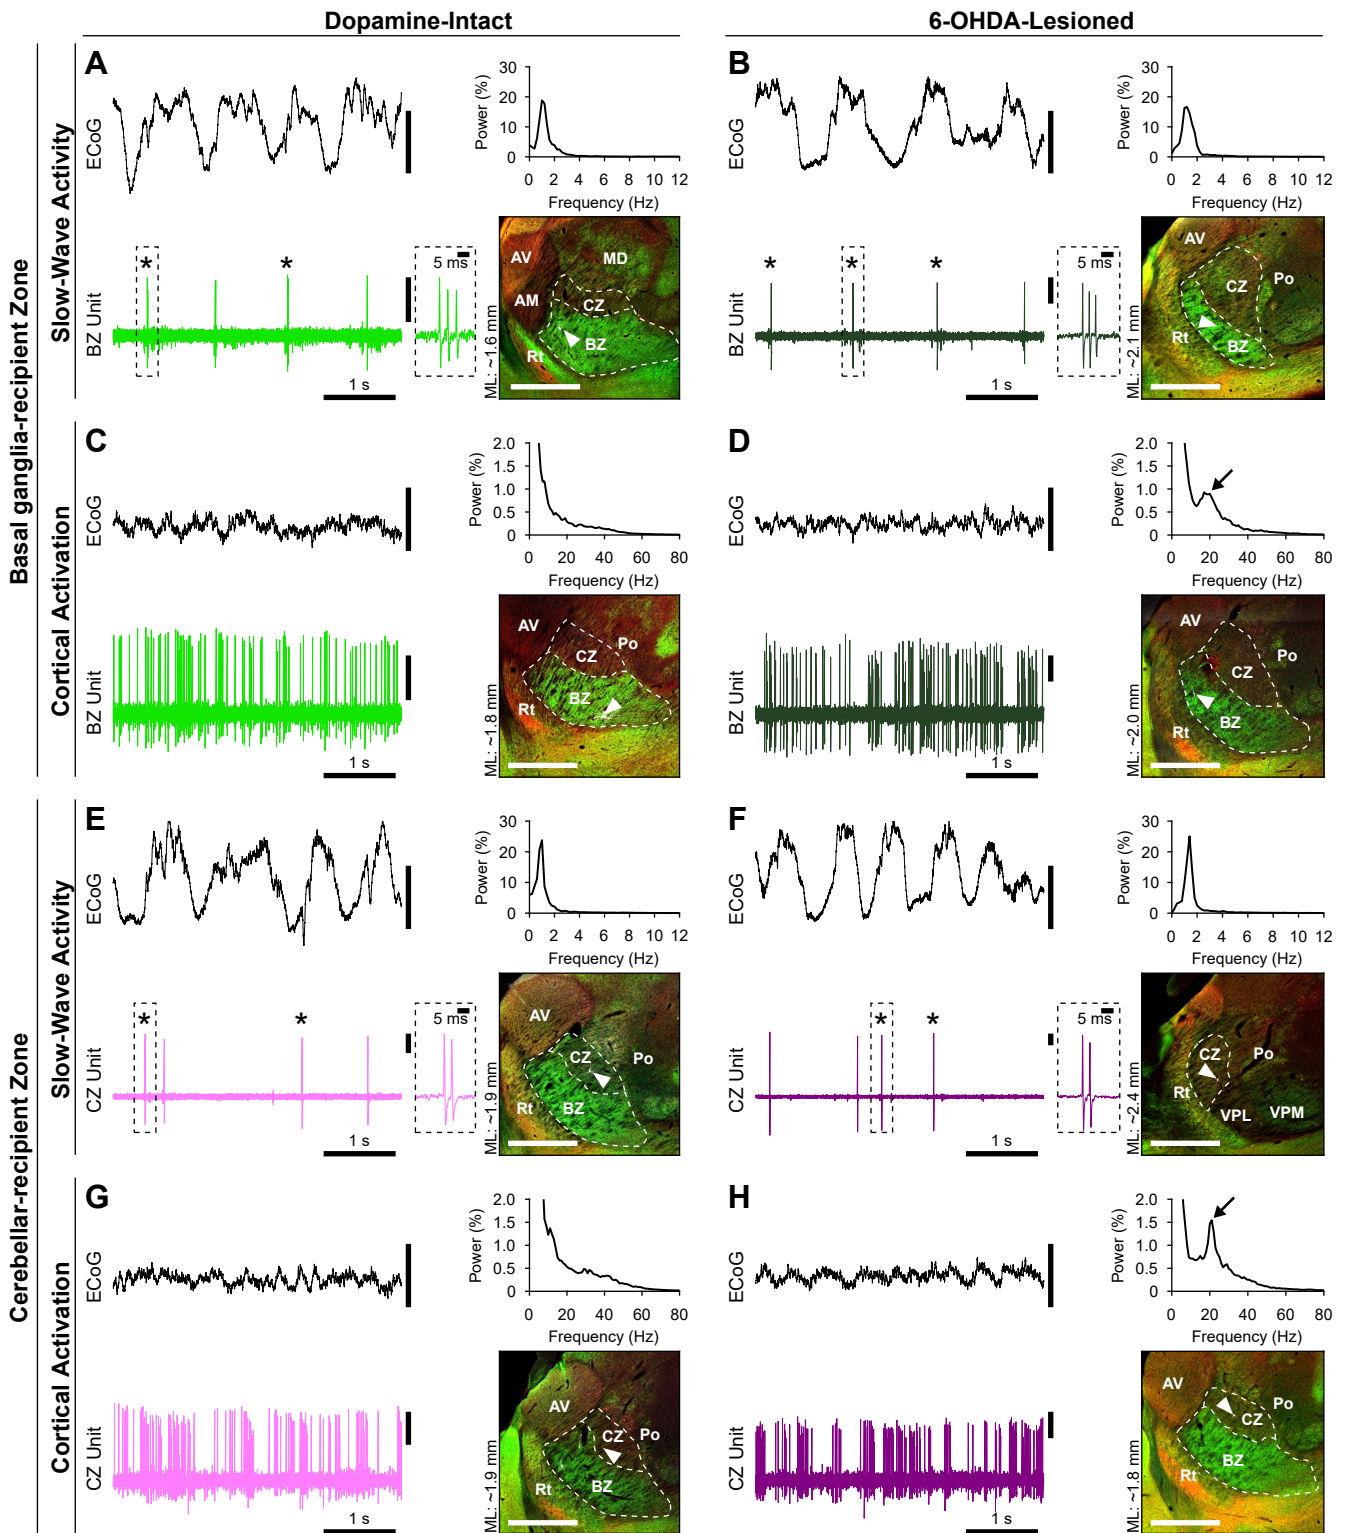

Figure 1



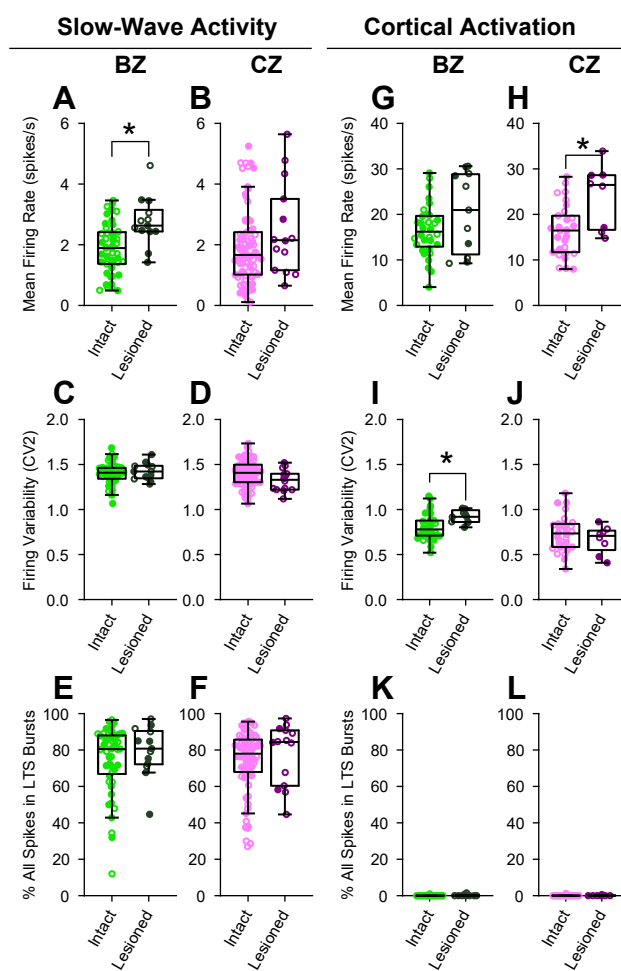

Figure 2

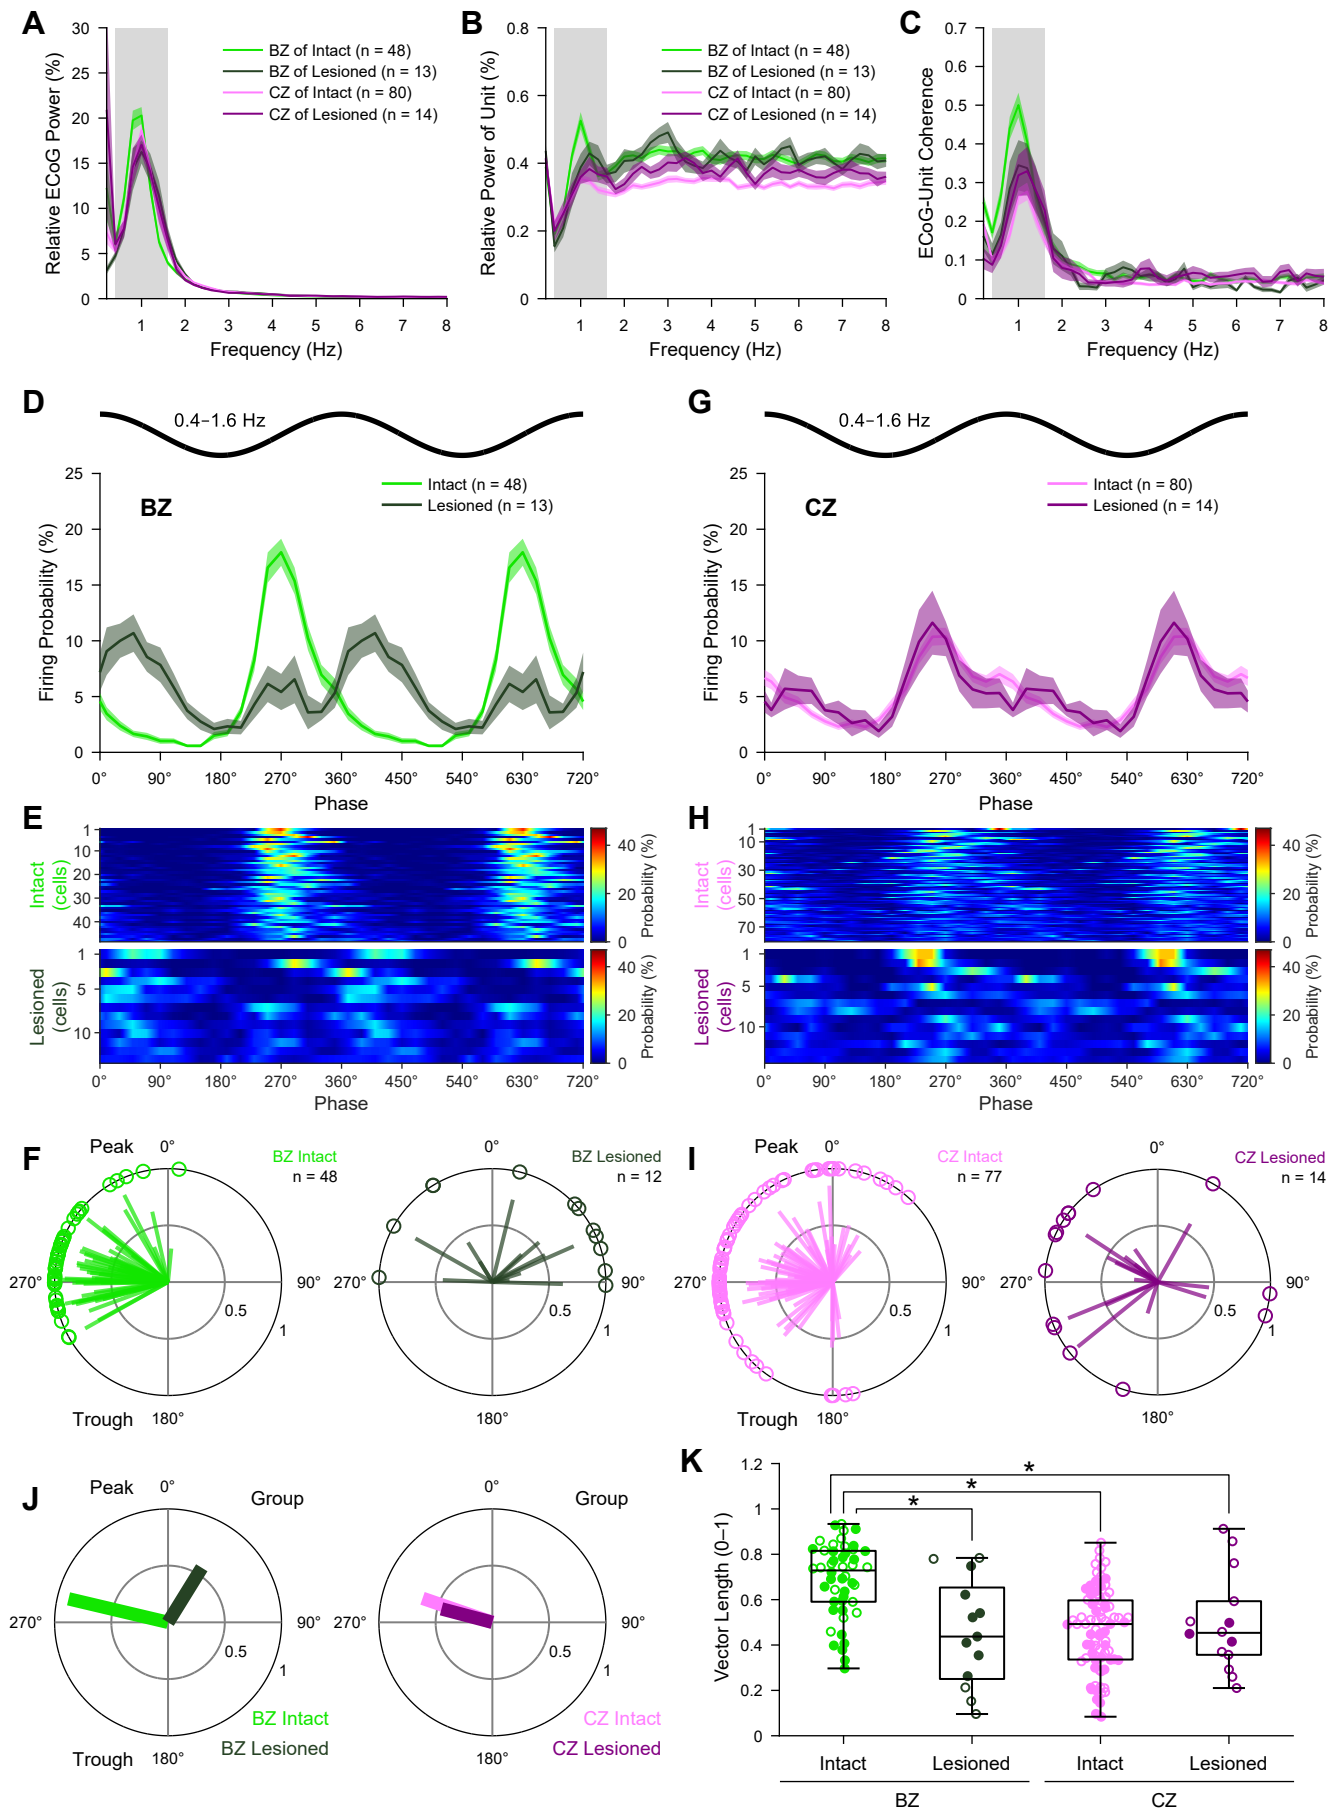

Figure 3

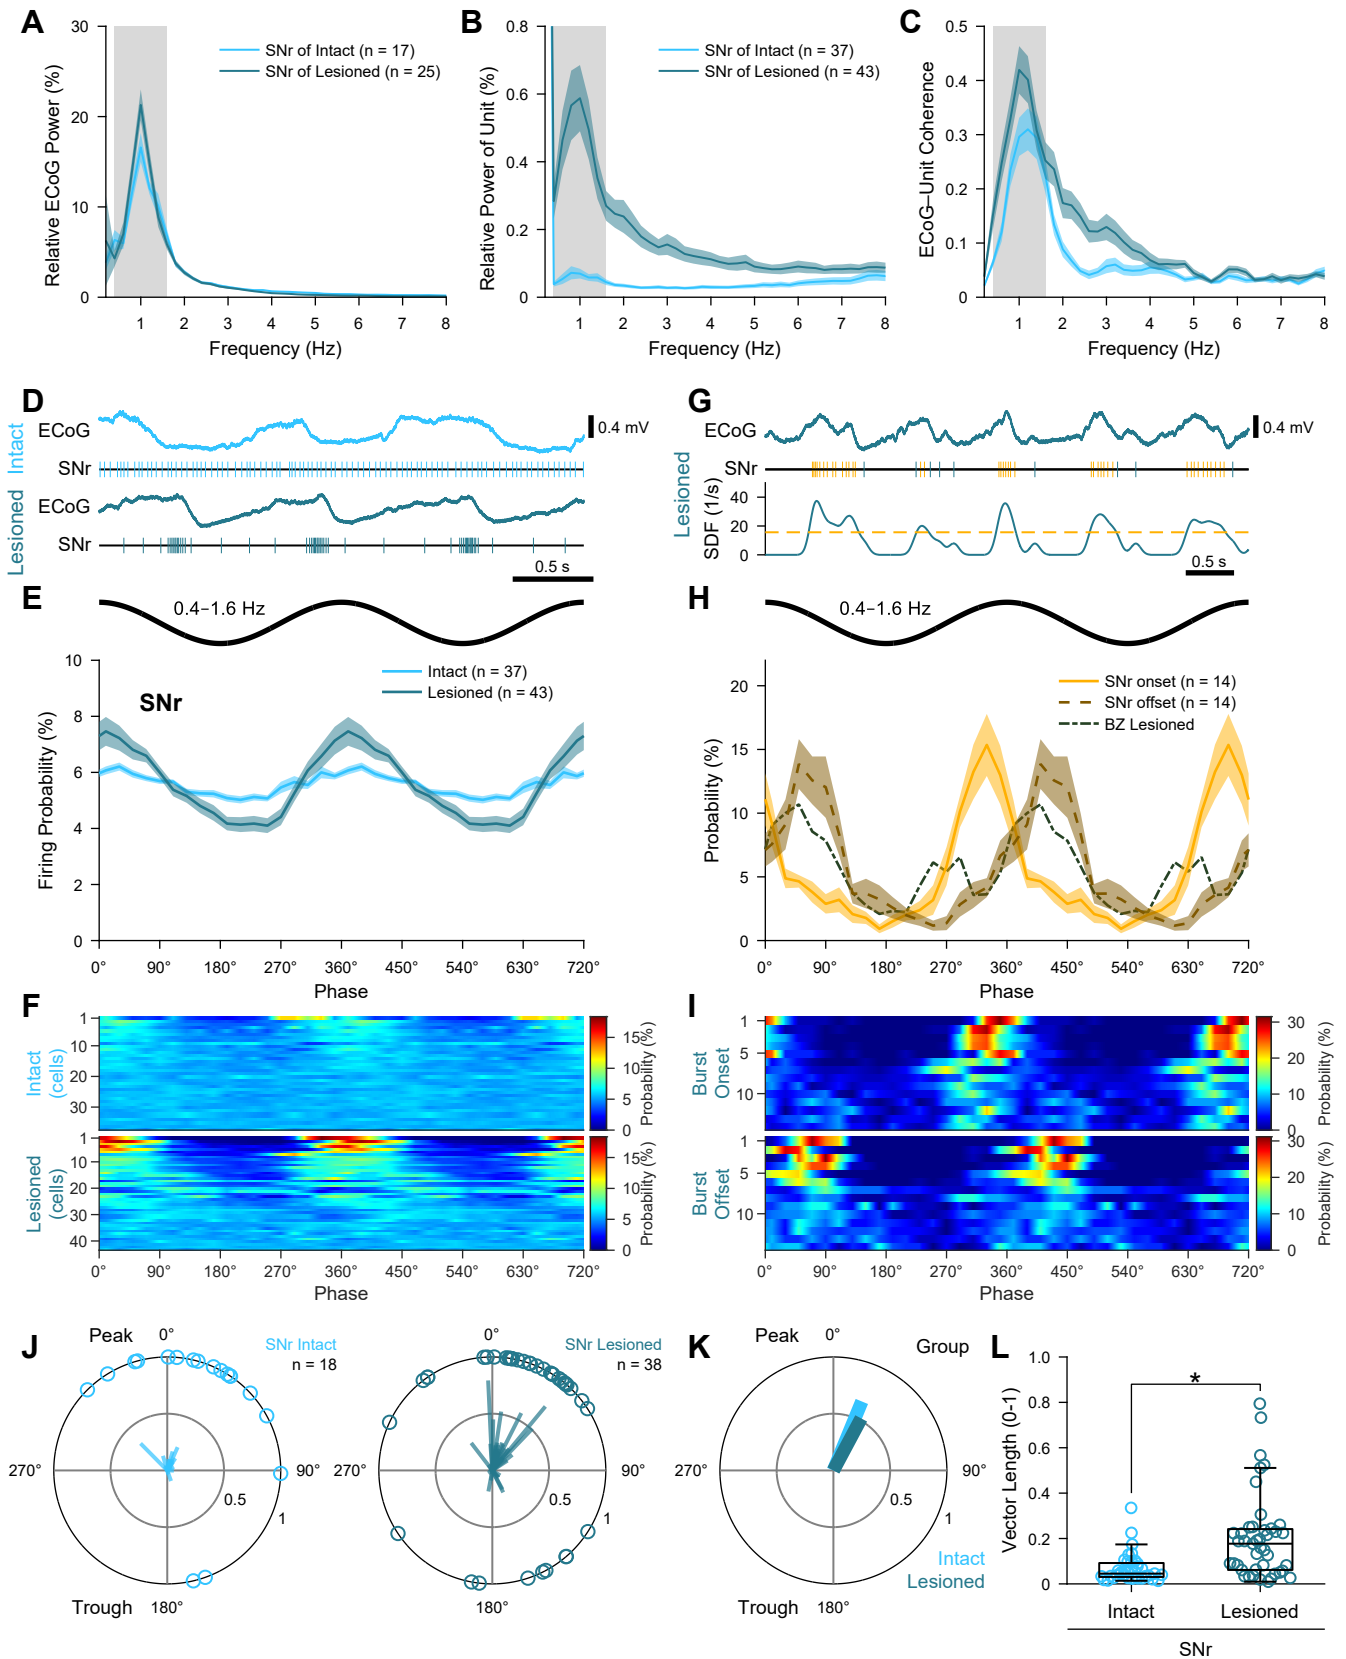

Figure 4

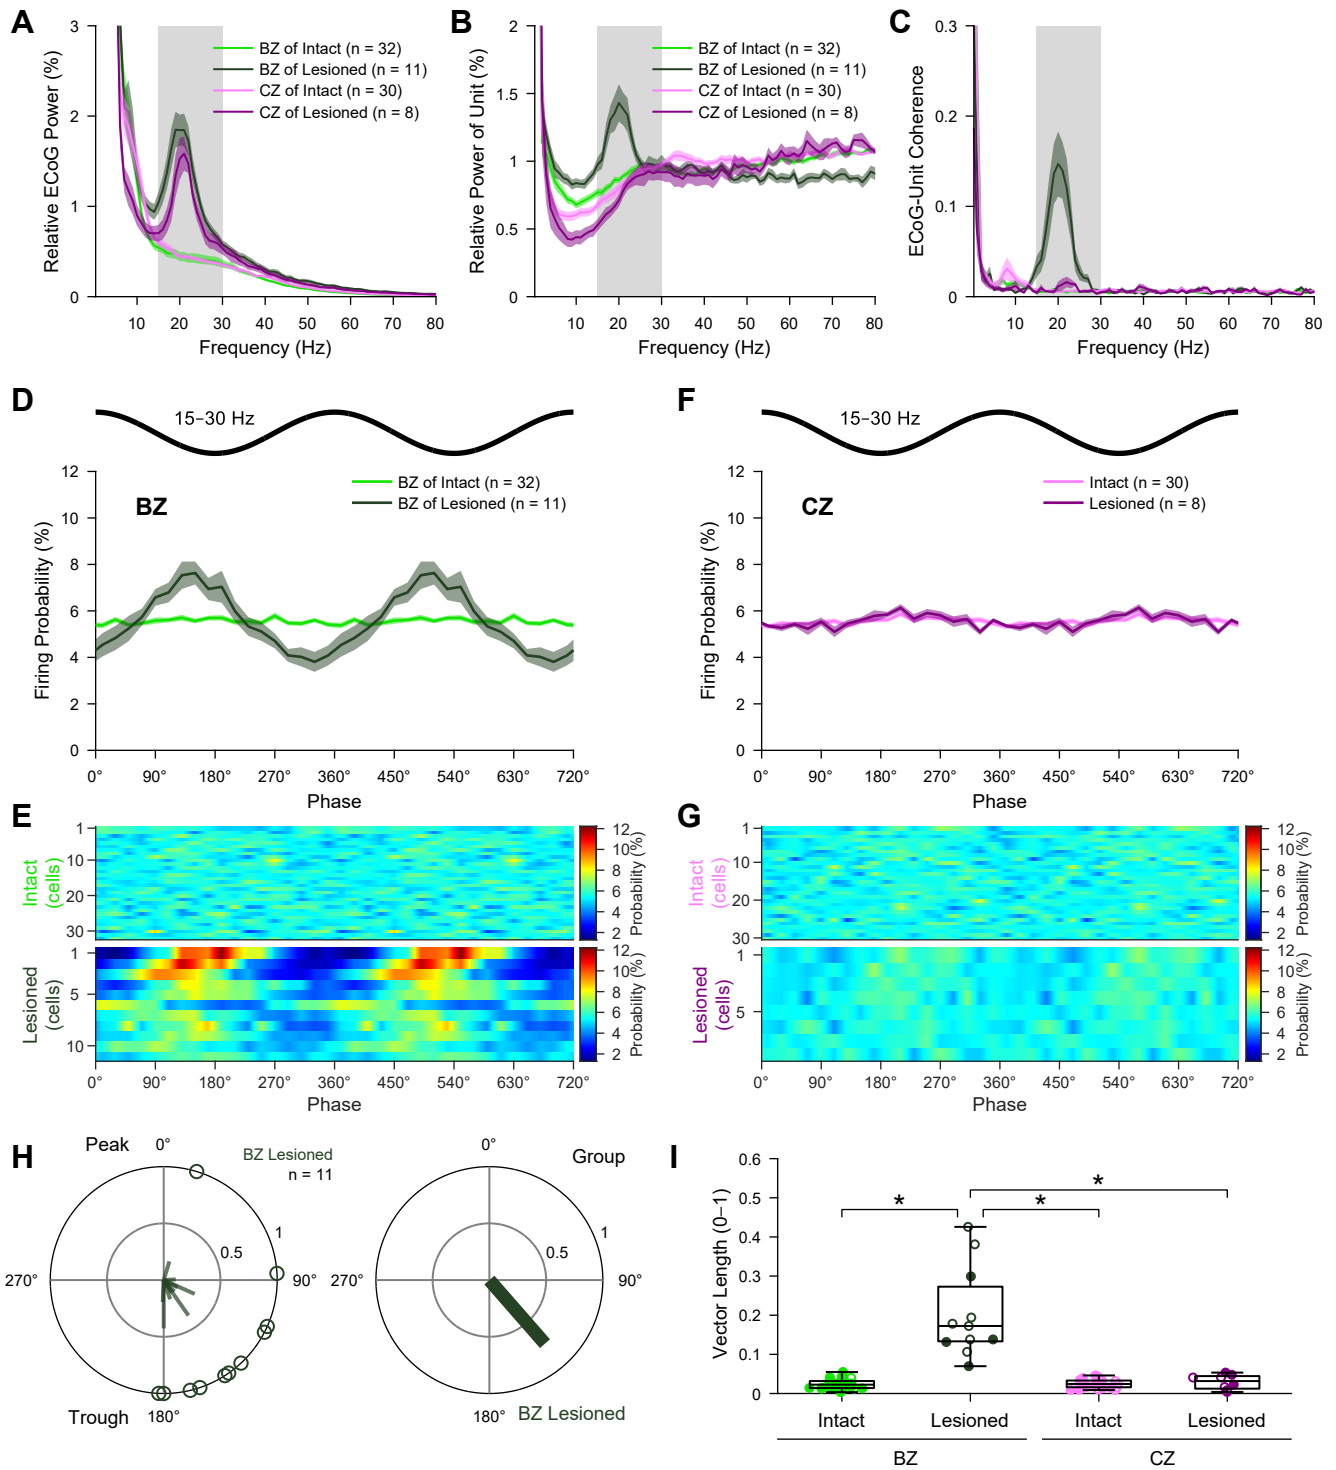

Figure 5

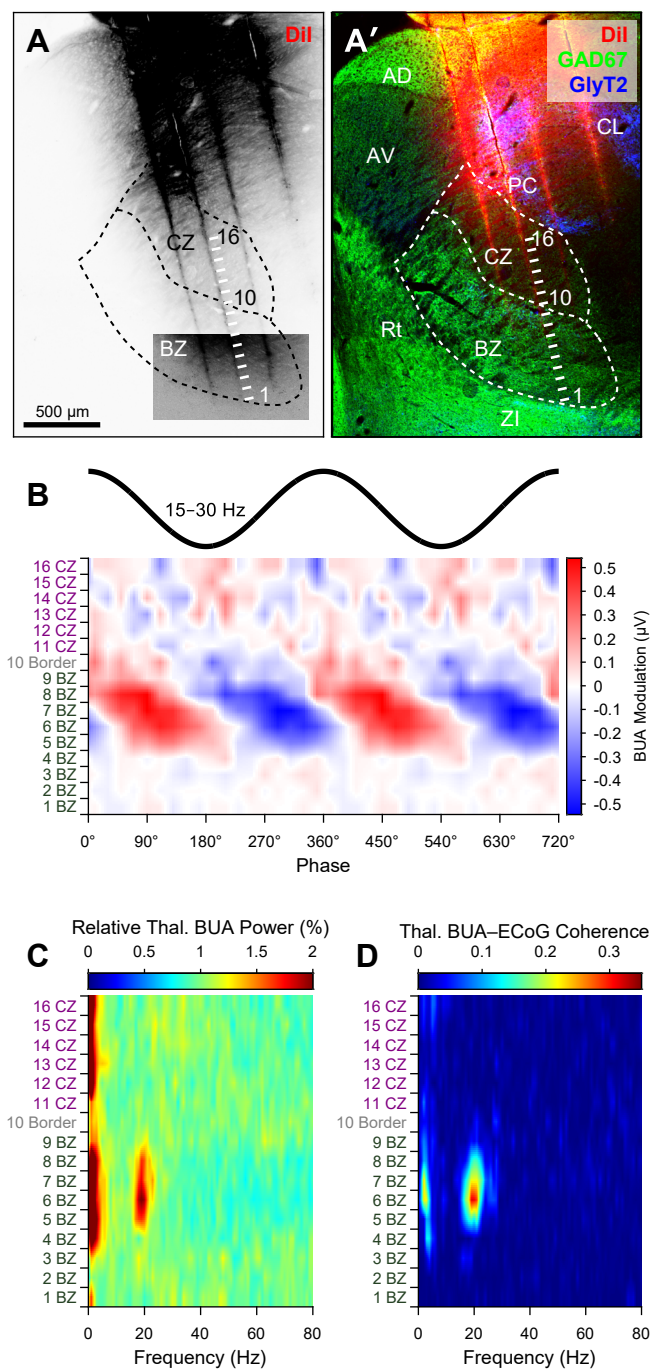

Figure 6

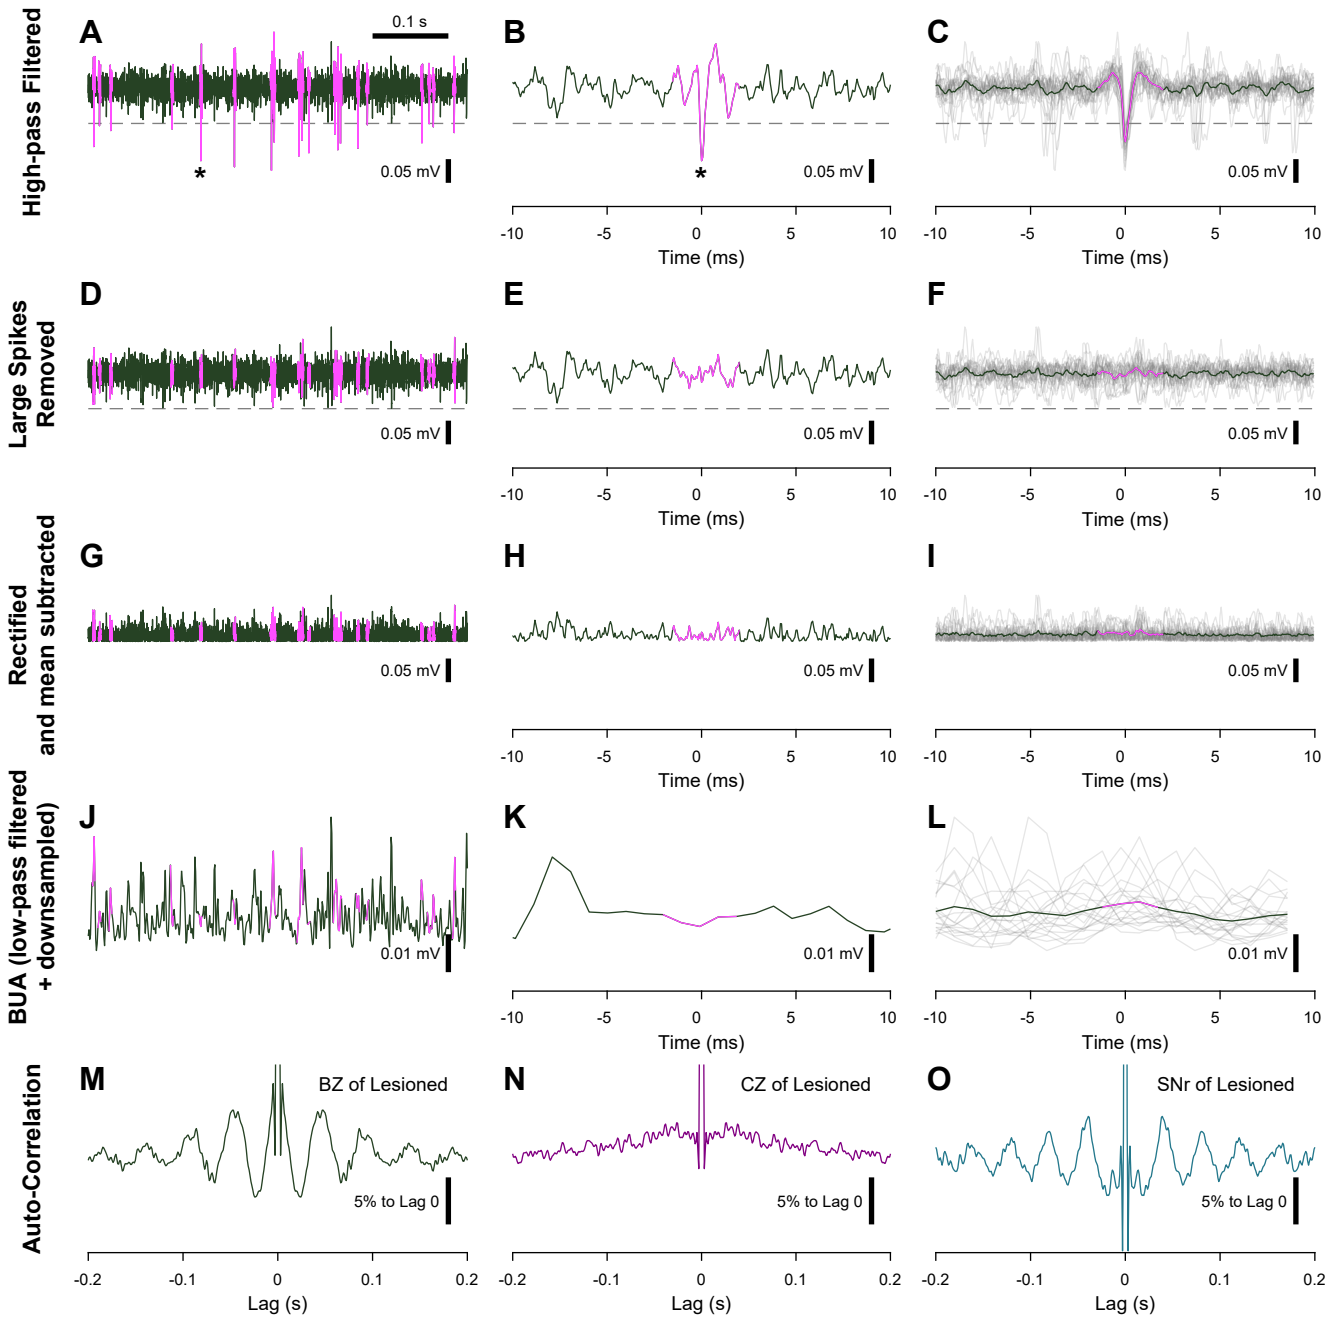

Figure 6-1

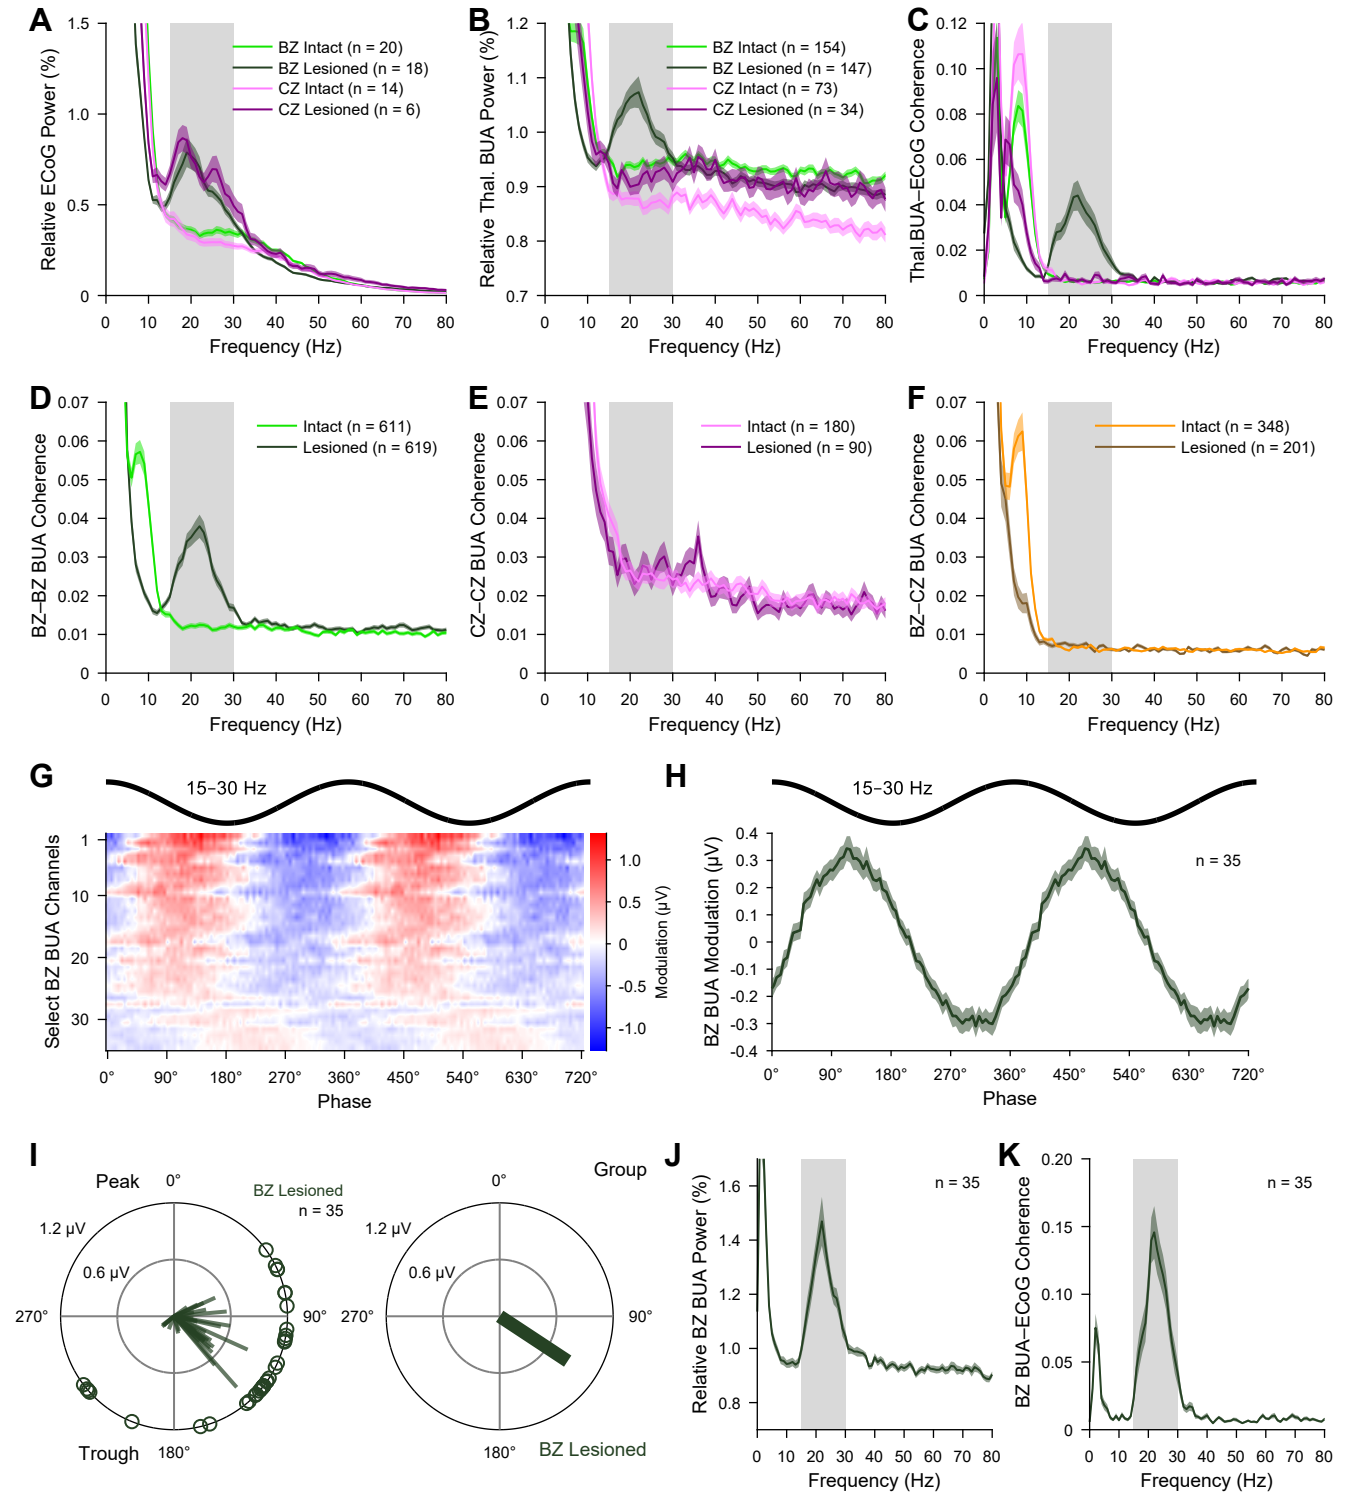

Figure 7



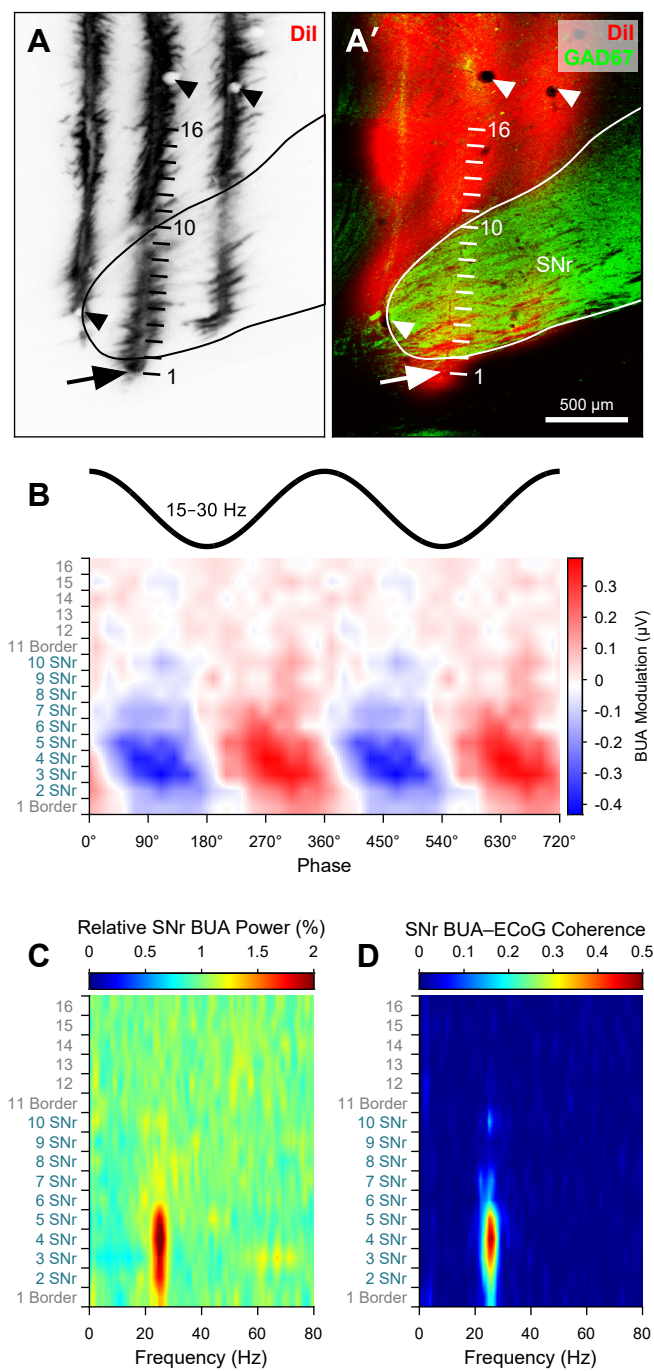

Figure 8

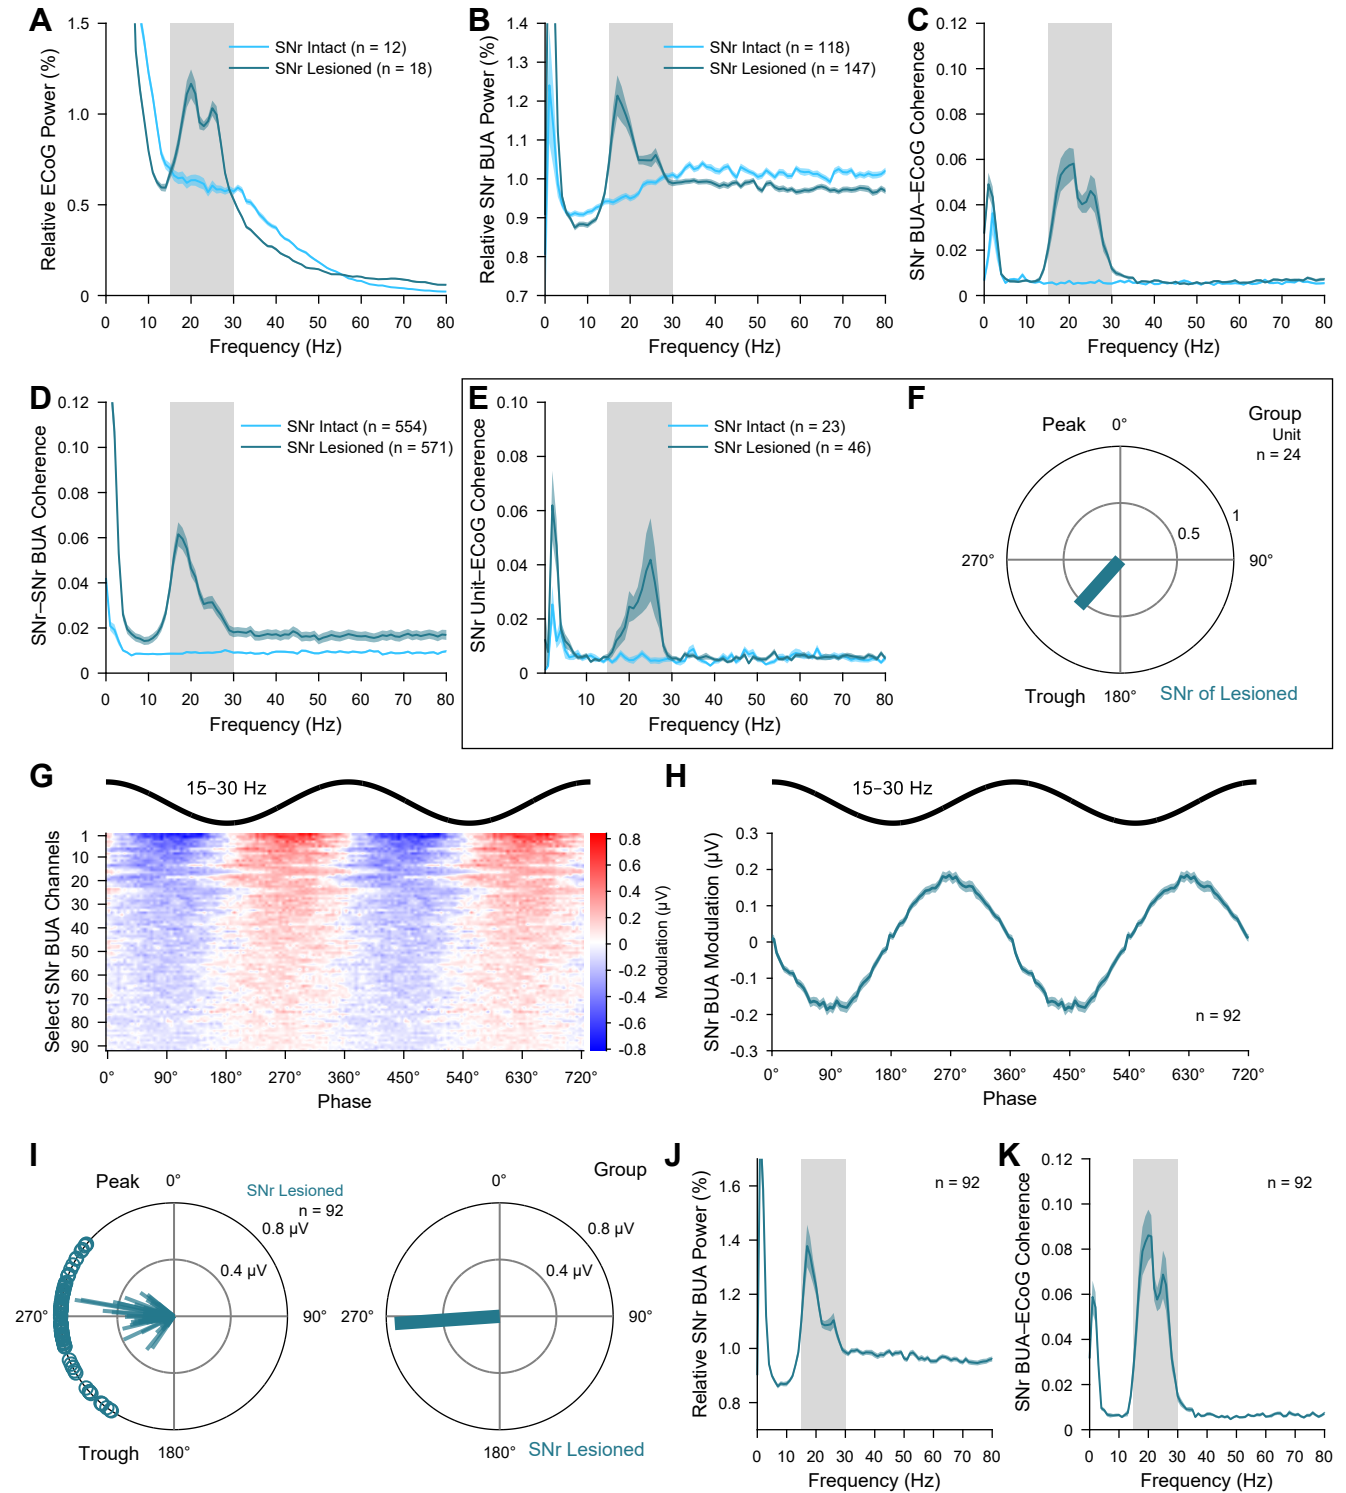

Figure 9

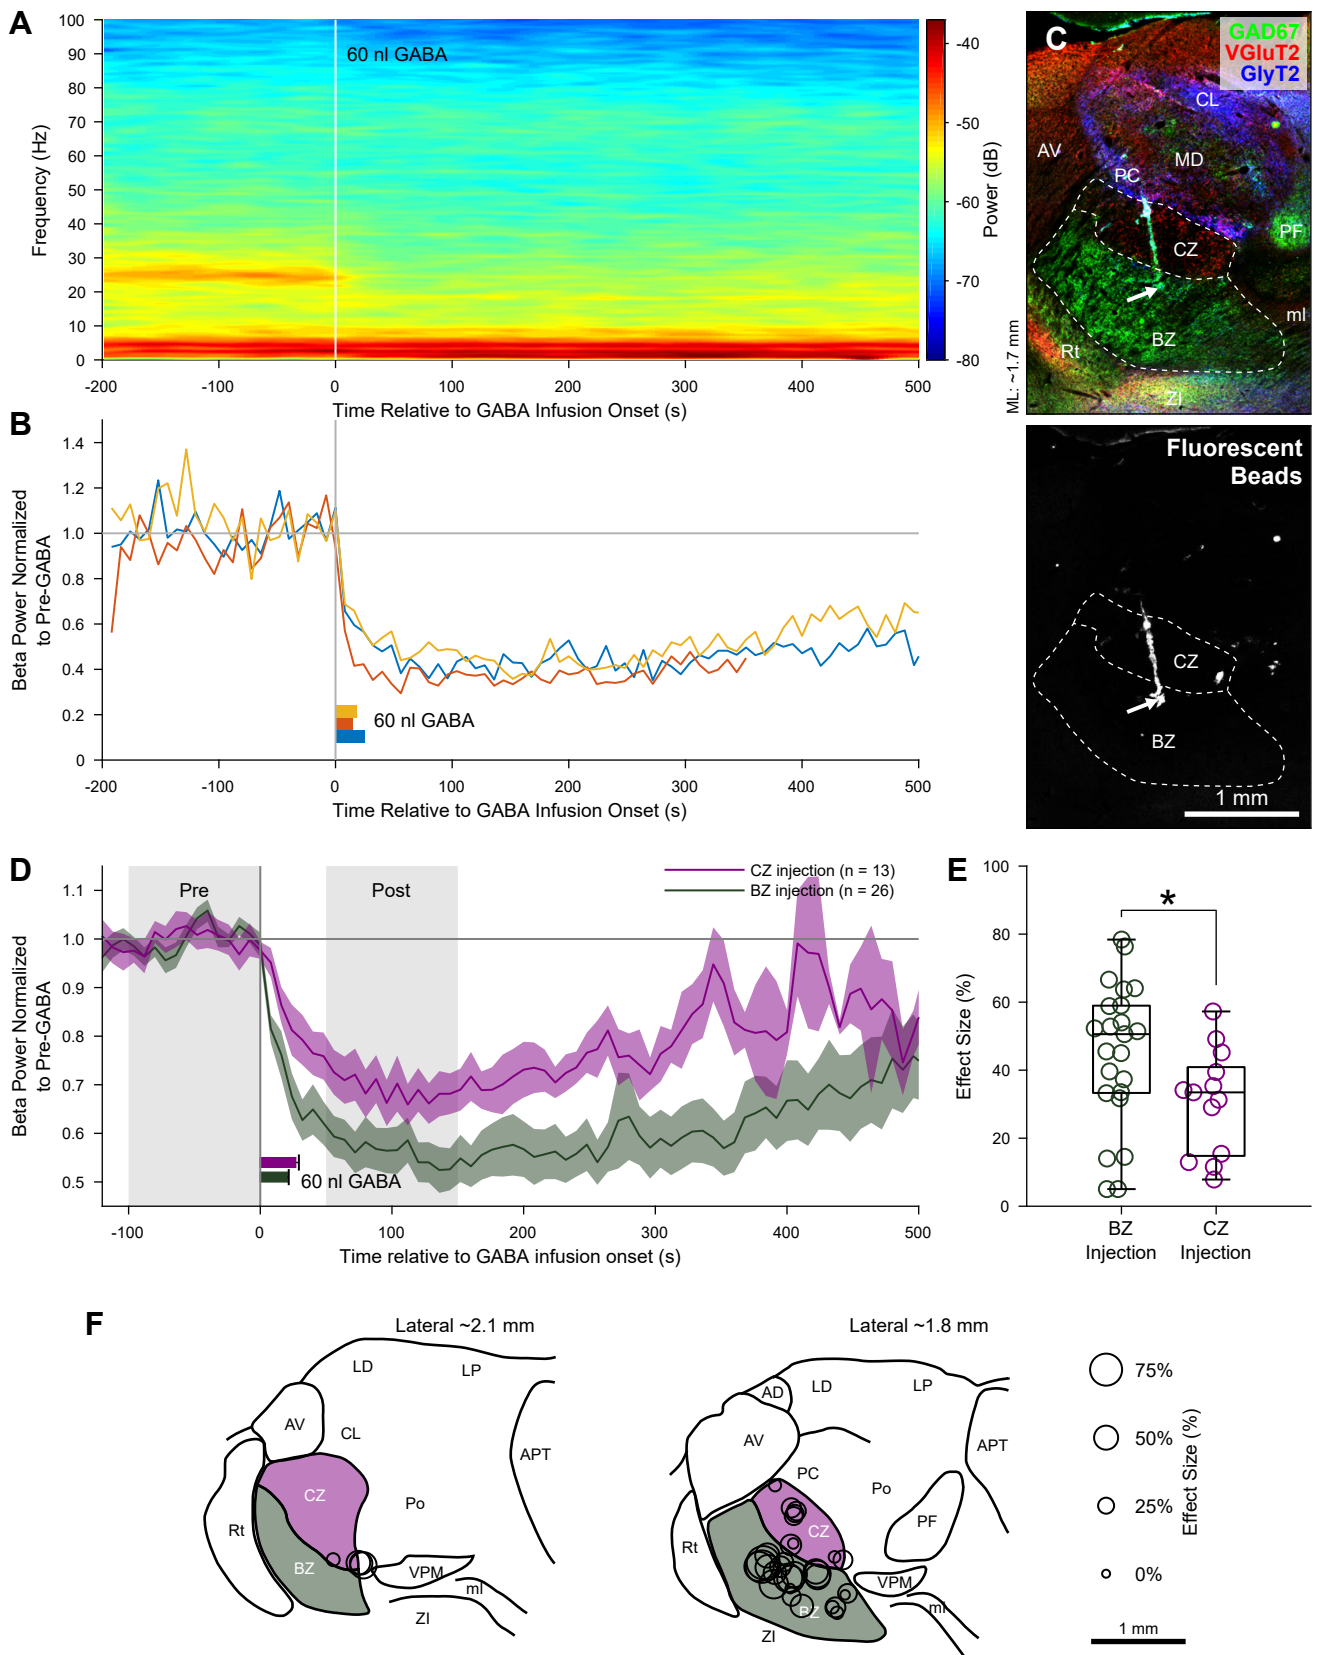

Figure 10
